1

# 1 Global distribution patterns of marine nitrogen-fixers by 2 imaging and molecular methods

3

4 Running title: Diazotrophs in *Tara* Oceans

5 Juan José Pierella Karlusich<sup>1,2</sup>, Eric Pelletier<sup>2,3</sup>, Madeline Carsique<sup>1</sup>, Etienne

6 Dvorak<sup>1</sup>, Sébastien Colin<sup>4</sup>, Marc Picheral<sup>2,5</sup>, Rainer Pepperkok<sup>2,6</sup>, Eric Karsenti<sup>1,2,6</sup>,

7 Colomban de Vargas<sup>2,4</sup>, Fabien Lombard<sup>2,5,7</sup>, Patrick Wincker<sup>2,3</sup>, Chris Bowler<sup>1,2\*</sup>,

8 Rachel A Foster<sup>8\*</sup>

9 <sup>1</sup> Institut de Biologie de l'ENS (IBENS), Département de biologie, École normale supérieure, CNRS,  
10 INSERM, Université PSL, 75005 Paris, France

11 <sup>2</sup> CNRS Research Federation for the study of Global Ocean Systems Ecology and Evolution, FR2022/  
12 *Tara* Oceans GOSEE, 3 rue Michel-Ange, 75016 Paris, France

13 <sup>3</sup> Génomique Métabolique, Genoscope, Institut François Jacob, CEA, CNRS, Univ Evry, Université  
14 Paris-Saclay, 91057 Evry, France

15 <sup>4</sup> Sorbonne Université, CNRS, Station Biologique de Roscoff, UMR 7144, ECOMAP, 29680 Roscoff,  
16 France

17 <sup>5</sup> Sorbonne Universités, CNRS, Laboratoire d'Océanographie de Villefranche (LOV), 06230  
18 Villefranche-sur-Mer, France

19 <sup>6</sup> European Molecular Biology Laboratory, Heidelberg, Germany

20 <sup>7</sup> Institut Universitaire de France (IUF), Paris, France

21 <sup>8</sup> Department of Ecology, Environment and Plant Sciences, Stockholm University Stockholm Sweden

22 \*corresponding authors: Rachel Foster ([rachel.foster@su.se](mailto:rachel.foster@su.se)) and Chris Bowler

23 ([cbowler@bio.ens.psl.eu](mailto:cbowler@bio.ens.psl.eu))

24 keywords: *Tara* Oceans, diazotroph, symbioses, diatom diazotroph associations,

25 *Richelia*, *Trichodesmium*, non-cyanobacterial diazotrophs, spheroid bodies,

26 ultrasmall bacteria

2

27 **Abstract**

28 Biological nitrogen fixation sustains ~50% of ocean primary production. However, our  
29 understanding of marine N<sub>2</sub>-fixers (diazotrophs) is hindered by limited observations.  
30 Here, we developed a quantitative image analysis pipeline in concert with mapping  
31 of molecular markers for mining >2,000,000 images and >1,300 metagenomes from  
32 *Tara* Oceans, covering surface, deep chlorophyll maximum and mesopelagic layers  
33 across 6 organismal size fractions (0-2000 µm). Imaging and molecular data were  
34 remarkably congruent. Diazotrophs were detected from ultrasmall bacterioplankton  
35 (<0.2 µm) to mesoplankton (180 to 2000 µm). We identified several new high density  
36 regions of diazotrophs. Distributional and abundance patterns support the previous  
37 canonical view that larger sized diazotrophs (>10 µm) dominate the tropical belts,  
38 while unicellular diazotrophs were found in surface and mesopelagic samples.  
39 Multiple co-occurring diazotrophic lineages were frequently encountered, suggesting  
40 that complex overlapping niches are common. Overall, this work provides an  
41 updated global snapshot of marine diazotroph biogeographical diversity and  
42 highlights new sources and sinks of diazotroph-fueled new production.

## 43 Introduction

44 Approximately half of global primary production occurs in the oceans <sup>1</sup>, fueling  
45 marine food webs, plankton decomposition and sequestration of fixed carbon to the  
46 ocean interior. Marine primary production is often limited by nitrogen (N) in the vast  
47 expanses of the open ocean (approximately 75% of surface ocean) <sup>2,3</sup>. In these  
48 regions, the biological reduction of di-nitrogen gas (N<sub>2</sub>) to bioavailable N, a process  
49 called biological N<sub>2</sub> fixation (BNF), is a critical source of new N to the ecosystem and  
50 ultimately controls the uptake and sequestration of carbon dioxide (CO<sub>2</sub>) <sup>4-6</sup>.

51

52 In the upper sunlit ocean, the majority of BNF is mediated by a few groups of N<sub>2</sub>-  
53 fixing (diazotrophic) cyanobacteria. Traditionally it was thought that marine BNF was  
54 largely restricted to the subtropical and tropical oceans and was predominantly  
55 mediated by relatively larger sized cyanobacterial organisms and holobionts (> 10  
56 μm) such as colony-forming non-heterocystous *Trichodesmium* spp., and  
57 heterocystous cyanobacteria forming symbioses with diatoms, also called diatom  
58 diazotroph associations (DDAs) (*Richelia intracellularis*, *Calothrix rhizosoleniae*,  
59 hereafter *Richelia* and *Calothrix*) <sup>7</sup>. More recently, unicellular cyanobacteria (UCYN)  
60 have been detected in environmental samples outside the tropical belts by qPCR  
61 targeting the BNF marker gene *nifH* <sup>8</sup>. One of these UCYN groups is *Candidatus*  
62 *Atelocyanobacterium thalassa* (hereafter UCYN-A). Three UCYN-A strains (A-1, A-2,  
63 A-3) live in symbiosis with a small single celled eukaryote (haptophyte) <sup>9-13</sup>. UCYN-B  
64 is another unicellular group that is most closely related to *Crocospaera watsonii*  
65 (hereafter *Crocospaera*). UCYN-B lives singly, colonially or in symbioses with a  
66 large chain-forming diatom <sup>14-16</sup>. UCYN-C is the third marine unicellular group

7

67 identified thus far by *nifH* sequence, and is most closely related to the free-living  
68 unicellular diazotroph *Cyanothece* sp. ATCC 51142<sup>17</sup>. Finally, non cyanobacterial  
69 diazotrophs (NCDs), including Archaea and Bacterial lineages, co-occur with the  
70 cyanobacterial diazotrophs in the surface ocean and additionally below the photic  
71 layer. The distribution and *in situ* activity of NCDs are poorly constrained and difficult  
72 to estimate<sup>18–21</sup>.

73

74 Luo et al<sup>22</sup> compiled the first database of diazotroph abundance in the global ocean  
75 for the MARine Ecosystem DATa (MAREDAT) project, consisting of 44 datasets  
76 (1966-2011), including microscopy-based counts and *nifH* qPCR studies. It should  
77 be noted that not all diazotrophs can be identified by microscopy, and qPCR has  
78 limitations, thus microscopy counts are only for *Trichodesmium*, *Richelia* and  
79 *Calothrix*, while the qPCR datasets additionally contain information about UCYN-A,  
80 UCYN-B and UCYN-C (Supplementary Fig. S1a). Recently, Tang and Cassar<sup>23</sup>  
81 updated the MAREDAT dataset with 17 additional qPCR datasets (2012-2018),  
82 resulting in more than doubling of the *nifH* observations. Both MAREDAT and the  
83 updated version have low coverage in vast regions of the global ocean, including the  
84 Mediterranean Sea (MS), the Red Sea (RS), the Arctic Ocean (AO), the Indian  
85 Ocean (IO), the South Atlantic Ocean (SAO) and the western Equatorial Pacific  
86 Ocean near South America (Supplementary Fig. S1a). Several of these poorly  
87 sampled areas were sampled during the *Tara* Oceans circumnavigation (2009-2013)  
88<sup>24</sup> (Supplementary Fig. S1b).

89

90 *Tara* Oceans collected plankton samples separated into discrete size fractions using  
91 a serial filtration system<sup>25</sup>; some samples were used to generate parallel molecular

8



9

92 and imaging datasets. The *Tara Oceans* gene catalog from samples enriched in  
93 free-living prokaryotes is based on the assembly of metagenomes and is highly  
94 comprehensive <sup>26,27</sup>. However, the larger plankton size fractions enriched in  
95 eukaryotes are genomically much more complex, and thus current *Tara Oceans*  
96 gene catalogs from these fractions are based only on poly-A-tailed eukaryotic RNA  
97 <sup>28,29</sup>. Hence, the prokaryotes from these larger size fractions have been unstudied  
98 and limited to specific taxa based on these poly-A assembled sequences <sup>30-32</sup>. The  
99 *Tara Oceans* imaging dataset <sup>33</sup> is also underutilized, especially due to the lack of  
100 well-established workflows. Overall, the cyanobacterial diazotrophs, especially those  
101 with diverse life histories (colonial, symbiotic, chain formers), have been poorly  
102 characterized (with the exception of UCYN-A; see <sup>13,18,26,30,32,34</sup>).

103

104 Here, we identify the diversity, abundance and distribution of symbiotic, colony-  
105 forming, and particle-associated diazotrophs in the World's ocean based on the *nifH*  
106 gene normalized to the bacterial single-copy housekeeping gene *recA* from >1,300  
107 *Tara Oceans* metagenomes <sup>26,28,29</sup>. In parallel, we trained an image classification  
108 model and utilized it with the *in situ* images from an Underwater Vision Profiler (UVP)  
109 <sup>35</sup> and confocal microscopy <sup>33</sup> to generate a versatile analytical pipeline from images  
110 to genomics and genomics to images. Combined, our results provide an improved  
111 global overview of diazotroph abundances, diversity, and distribution (vertical and  
112 horizontal), as well as the environmental factors that shape these patterns.

113

114

11

## 115 **Results and Discussion**

116

### 117 *Diazotroph abundance and biovolume based on imaging methods*

118 We first used machine learning tools (see Methods; <sup>33</sup>) to search for diazotrophs in  
119 the *Tara* Oceans high-throughput confocal imaging dataset derived from 61 samples  
120 of the 20-180  $\mu\text{m}$  plankton size fraction collected at 48 different sampling locations  
121 (Supplementary Fig. S2). We obtained >400 images of DDAs and almost 600  
122 images of *Trichodesmium* free filaments (Fig. 1); all images were from the tropical  
123 and subtropical regions and were consistent with the molecular analyses and  
124 detected in several new locations not previously reported in diazotroph databases  
125 (see below; Fig. 2, Supplementary Figs. S3 and S4). In addition, we detected  
126 *Crocospaera*-like colonies as well as the lesser-studied symbiosis between this  
127 diazotrophic cyanobacterium and the centric diatom *Climacodium* <sup>14-16</sup> on the Pacific  
128 side of the Panama Canal (TARA\_140) (Fig. 1). It should be noted that there were  
129 only a few *Crocospaera* cells (1-2 cells) seemingly embedded in the dense  
130 chloroplast fluorescence of each *Climacodium* host, demonstrating the high  
131 resolution of our image recognition model.

132

133 Abundance ranges based on number of images for the 3 main DDAs, *Hemiaulus*-  
134 *Richelia*, *Rhizosolenia-Richelia*, and *Chaetoceros-Calothrix*, were low and are  
135 representative of background densities (e.g., 1.5-20 symbiotic cells  $\text{L}^{-1}$ ) (Fig. 2 and  
136 Supplementary Fig. S3a). The low densities and detection, especially *Chaetoceros*-  
137 *Calothrix* which can form long chains (> 50 cells  $\text{chain}^{-1}$ ) and the larger *Rhizosolenia*-  
138 *Richelia* symbioses, were not surprising given the pre-filtration step (180- $\mu\text{m}$  mesh)  
139 in the sampling protocol that would exclude larger cells and chains. Although

12

13

140 *Hemiaulus-Richelia* was the most frequently detected, its chains were often short,  
141 and sometimes cell integrity was compromised. Variation in the number and length  
142 of the symbiont filaments (trichomes) was also observed (Fig. 3). This included  
143 observations of free *Richelia* and *Calothrix* filaments (Supplementary Fig. S5), which  
144 are rarely reported in the literature <sup>36</sup>, but are not unexpected for facultative  
145 symbionts, which is the case for *Calothrix* and *Richelia* symbionts of *Chaetoceros*  
146 and *Rhizosolenia*, respectively <sup>37,38</sup>.

147

148 DDAs were broadly distributed and detected in several new locations not previously  
149 reported in diazotroph databases <sup>22,23</sup>. These areas included several different stations  
150 of the IO, southwest SAO, the South Pacific gyre, and the Pacific side of the Panama  
151 Canal (Supplementary Fig. S3). Free *Richelia/Calothrix* filaments could also be  
152 quantified in the same samples and regions, as well as at station TARA\_39 (IO),  
153 where symbiotic hosts were not observed (Supplementary Fig. S5). DDAs were also  
154 concentrated in surface samples, with the exception of two deeper samples showing  
155 *Hemiaulus-Richelia* densities as high as in the surface: one sample from 108 m at  
156 station ALOHA (TARA\_131) and a second from 38 m at TARA\_143 (Gulf Stream,  
157 North Atlantic) (Fig. 2b). Seasonal blooms of DDAs are well known at station  
158 ALOHA, with observations of DDAs in moored sediment traps below the photic zone  
159 <sup>39-41</sup>. However, observations of symbiotic diatoms in the Gulf Stream are more rare <sup>42</sup>.

160

161 Observations of free filaments of *Trichodesmium* (1-40 filaments L<sup>-1</sup>) co-occurred  
162 with DDAs in most stations from the IO and NPO (Fig. 2a and Supplementary Fig.  
163 S4), but they were also observed at sites where DDAs were not detected, such as in  
164 the Pacific North Equatorial Current (TARA\_136), which was unexpected.

14

15

165 *Trichodesmium* is favored in warm (>26 °C) oligotrophic waters with low wind stress  
166 and a stable mixed layer (100 m or more)<sup>7</sup>. Tens to hundreds of *Trichodesmium*  
167 filaments often aggregate into fusiform-shaped colonies usually referred to as ‘tufts’  
168 or ‘rafts’ or round-shaped colonies called ‘puffs’ (Fig. 1). The tremendous range in  
169 *Trichodesmium* colony diameter (from 200 µm to 5 mm) challenges our ability to  
170 collect and therefore consistently quantify/estimate their abundances. However,  
171 these dimensions were detectable and quantifiable by *in situ* imaging using the  
172 UVP5 (Fig. 2 and Supplementary Fig. S4a). Colonies were more prevalent in NAO  
173 and NPO, while IO stations were more enriched in free filaments (Fig. 2a and  
174 Supplementary Fig. S4a), probably related to the enhanced colony formation of  
175 *Trichodesmium* under nutrient limitation, as has been observed in culture  
176 experiments<sup>43</sup>.

177

178 Single-cell free-living NCDs were estimated by combining flow cytometry estimates  
179 of free-living bacterial densities with diazotroph relative abundances derived from  
180 metagenomic sequencing of the 0.22-1.6/3 µm plankton size fractions (see  
181 Methods). We detected concentrations up to  $\sim 2.8 \times 10^6$  cells L<sup>-1</sup>, with the highest  
182 values in the Pacific Ocean (Fig. 2a). Our estimates agree with recent reports based  
183 on the reconstruction of metagenome-assembled genomes<sup>18</sup>.

184

185 The extensive imaging dataset from *Tara* Oceans also allowed us to convert  
186 abundance estimates into biovolumes. The comparison of individual abundance and  
187 biovolumes between the different diazotrophs from surface waters is shown in  
188 Fig. 2c. NCDs are by far the most abundant diazotrophs in the surface ocean,  
189 however DDAs and, in particular *Trichodesmium*, dominate in terms of biovolume  
190 (Fig. 2c). Cell density and biovolume of NCDs has not been reported previously at a

16

17

191 global scale, so our work presented here expands our understanding about the  
192 relative contributions for these recently recognized important diazotrophs.

193 *Diazotroph diversity and abundance using metagenomes from size fractionated*  
194 *plankton samples*

195 To gain further insights into the abundance and distribution patterns of diazotrophs  
196 across the whole plankton size spectrum, we compared the imaging data with  
197 metagenomic reads from the 5 main size fractions mapped against a comprehensive  
198 catalog of 41,251 *nifH* sequences (see Methods). The *nifH* catalog represents most  
199 of the genetic diversity reported for diazotroph isolates and environmental clone  
200 libraries (although it has some redundancy, see Methods), with 30% of the  
201 sequences derived from marine environments and the rest from terrestrial and  
202 freshwater habitats. Less than 0.01% of these *nifH* sequences (406 out of 41,251)  
203 mapped with at least 80% similarity to the 1,192 metagenomes, retrieving a total of  
204 87,810 mapped reads. Of the 406 sequences, 102 retrieved only one read. Mapped  
205 *nifH* reads were detected in slightly more than half of the samples (63% or 424 of  
206 673), which highlights the broad distribution of diazotrophs in the *Tara* Oceans  
207 dataset (blue circles in Fig. 4a for surface waters; Supplementary Table S1).

208

209 We used the single-copy core gene *recA* to quantify the bacterial community in each  
210 sample; thus the read abundance ratio of *nifH/recA* provides an estimate for the  
211 relative contribution of diazotrophs (see Methods). Our analysis shows both a  
212 dramatic increase (up to 4 orders of magnitude) in diazotroph abundance and a  
213 dynamic compositional shift towards the larger size classes of plankton (Fig. 5). For  
214 example, diazotrophs comprise only a small proportion of the bacterial community in

18

19

215 the 0.22-1.6/3  $\mu\text{m}$  size fraction (minimum-maximum values of 0.004-0.8%), however,  
216 they increase to 0.003-40% in the 180-2000  $\mu\text{m}$  size range (Fig. 5a). The increase is  
217 coincident with a change in taxonomy (Fig. 5b-c, Supplementary Table S1):  
218 proteobacteria and planctomycetes are the main components in the 0.22-1.6/3  $\mu\text{m}$   
219 size fraction (0.004-0.08% and 0.005-0.4%, respectively), while cyanobacterial  
220 diazotrophs dominate in the larger size fractions, including both filamentous  
221 (*Trichodesmium* and others) and non-filamentous types (free-living and symbiotic)  
222 (0.2-45% and 0.2-2%, respectively). When comparing the abundance patterns of  
223 these larger cyanobacterial diazotrophs based on our imaging methods with those  
224 based on metagenomic counts, the overlap was remarkable (Fig. 6, also compare  
225 panels a vs b in Supplementary Figs. S3 and S4). Hence, we developed a fully  
226 reversible pipeline from images to genomics and genomics to images to allow each  
227 to inform the other. The image analysis enables one to quickly identify which  
228 metagenomic sample(s) should contain a particular diazotroph. For populations like  
229 the cyanobacterial diazotrophs which are comparatively less abundant, this  
230 approach will reduce search time in genetic analyses.

231

232 The majority (95%) of the total recruited reads mapping to the *nifH* database  
233 corresponded to 20 taxonomic groups: 5 cyanobacteria, 2 planctomycetes, and 13  
234 proteobacteria. For the NCDs, the 2 planctomycetes and 7 of the 13 proteobacterial  
235 types corresponded to recent metagenome-assembled genomes (named HBD01 to  
236 HBD09; <sup>18</sup>) which additionally were among the top contributors to the *nifH* transcript  
237 pool in the 0.22-1.6/3  $\mu\text{m}$  size fraction of *Tara* Oceans metatranscriptomes <sup>26</sup>. We  
238 also found these taxa in the larger size fractions (Figs. 5c and 7). The 0.8  $\mu\text{m}$  pore-  
239 size filter enriches for the larger bacterial cells, while letting pass the smaller ones

20

21

240 (including more abundant taxa such as SAR11 and *Prochlorococcus*). However, it is  
241 interesting that we detected the NCDs in the three largest size fractions (5-20, 20-  
242 180 or 180-2000  $\mu\text{m}$ ), suggesting their attachment to particles (e.g. marine snow,  
243 faecal pellets)<sup>44</sup> and/or larger eukaryotic cells/organisms, aggregation into colonies.

244

245 The main cyanobacterial taxa corresponded to *Trichodesmium*, *Richelia/Calothrix*,  
246 and UCYNs (UCYN-A1, UCYN-A2 and *Crocospaera*). *Trichodesmium* represented  
247 the highest number of reads for *nifH* among all diazotrophs and constituted up to  
248 40% of the bacterial community in the three largest size fractions (Figs. 5c and 7).  
249 Although *Trichodesmium* is widespread in the oceans, forming high density surface  
250 slicks and blooms, recent evidence for polyploidy has been shown in field and  
251 cultured *Trichodesmium* populations<sup>45</sup>. Hence polyploidy could influence the higher  
252 number of sequence reads for mapping, and therefore the higher numbers of  
253 *Trichodesmium* in our analysis.

254

255 Relative abundance of UCYN-A1 was highest in the smaller size fractions 0.2-1.6/3  
256  $\mu\text{m}$  and 0.8-5  $\mu\text{m}$ , in accordance with the expected host size (1-3  $\mu\text{m}$ ; <sup>13,46,47</sup>), but was  
257 also detected in the larger size fractions (5-20, 20-180 and 180-2000  $\mu\text{m}$ ) (Figs. 5c  
258 and 7), probably related to particle association, which may subsequently sink to the  
259 deep ocean (see next section), or consumption by higher trophic levels<sup>48</sup>.

260

261 *Richelia* displayed the highest relative abundance in the 20-180  $\mu\text{m}$  size range, but  
262 was also detected in both the 5-20 and 180-2000  $\mu\text{m}$  size fractions (Figs. 5c and 7).  
263 *Richelia* is associated with both small and large diatoms (*Hemiaulus* and  
264 *Rhizosolenia*, respectively; Figs. 1 and 3), and occasionally has been reported as

22

23

265 free filaments<sup>36–38</sup>. Free filaments were also observed in our confocal analyses  
266 (Supplementary Fig. S5). Similar to *Richelia*, *Crocospaera* was also found in  
267 multiple size fractions (0.8-5  $\mu\text{m}$ , 5-20  $\mu\text{m}$ , 20-180  $\mu\text{m}$ , and 180-2000  $\mu\text{m}$ ), which is  
268 expected given its diverse life histories: free-living, colonial or symbionts of large  
269 *Climacodium* diatoms (Fig. 1)<sup>14–16</sup>. Other cyanobacterial symbionts of diatoms were  
270 also observed albeit in lower abundance, such as *Calothrix*, found in the 20-180  $\mu\text{m}$   
271 size range (Figs. 5c and 7) due to its association with chains of *Chaetoceros* (Fig. 1  
272 and 3).

273

274 Unexpectedly, we recruited reads with sequence similarity to *nifH* from ‘spheroid  
275 bodies’ (Supplementary Fig. S7a), which are cyanobacteria that have lost  
276 photosynthesis<sup>49</sup> and heretofore have only been reported as  $\text{N}_2$ -fixing  
277 endosymbionts in a few freshwater rhopalodiacean diatoms<sup>50–52</sup>. To our knowledge,  
278 this is the first report of these populations in marine waters. Detection levels were  
279 however low (~0.5% of total bacterioplankton community) and mainly derived from  
280 the 20-180  $\mu\text{m}$  size fraction (Figs. 5c and 7), which is consistent with the expected  
281 diatom host cell diameters (approximately 30-40  $\mu\text{m}$ <sup>53</sup>). These spheroid-body like  
282 reads were detected in surface waters from the IO, SPO and SAO  
283 (Supplementary Fig. S7b). In these regions we also detected some images of  
284 pennate diatoms containing round granules without chlorophyll autofluorescence  
285 (Supplementary Fig. S7c), but further research will be required to validate if these  
286 are in fact diatoms with diazotrophic symbionts.

287



25

## 288 *Insights into environmental distribution and depth partitioning of diazotrophs*

289 Diazotroph abundance displayed a latitudinal gradient, showing as expected higher  
290 relative abundances in tropical and subtropical regions, and a decrease at the  
291 equator where upwelling and higher dissolved nutrients are expected (Fig. 4). This  
292 pattern is congruent with decades of field observations (e.g., NAO, NPO) as well as  
293 modeling efforts <sup>23,54,55</sup>. Correlation analyses with environmental and physico-  
294 chemical variables measured during the *Tara* Oceans cruise identified higher  
295 abundances in oligotrophic waters (regions of low nitrate and phosphate  
296 concentrations) with sea surface temperatures >20 °C (and especially >25 °C), but  
297 with variable modeled dissolved iron concentrations in the range between 0.005 and  
298 2 nM (Fig. 9a). Temperature and nutrient availability are common factors which  
299 govern diazotroph abundances <sup>8,23,56</sup>. Iron should also be important for diazotrophs  
300 due to the high iron requirement for the nitrogenase enzyme <sup>57,58</sup>, therefore it was  
301 unexpected to find a less robust relationship between diazotroph abundances and  
302 modeled dissolved iron concentrations (Fig. 9a).

303

304 We further analysed abundance and distribution patterns within the epipelagic and  
305 mesopelagic layers (0-200 m and 200-1000 m, respectively). The higher numbers of  
306 N<sub>2</sub>-fixing cyanobacteria detected in the surface (5 m) compared to the DCM layer  
307 (17-188 m) in both the metagenomic and imaging datasets confirms expected  
308 distributions (Figs. 2b and 9c, also compare Fig. 8 and Supplementary Fig. S8).  
309 However, detection of both *Trichodesmium* and the DDA symbionts were  
310 nonetheless significant in some DCM samples from diverse regions: IO, SPO, and  
311 RS (Supplementary Fig. S8). *Richelia* is expected at depth given its reported rapid  
312 sinking, and observations in moored sediment traps (station ALOHA: <sup>39,59</sup>), while

26

27

313 *Trichodesmium* is considered to have a poor export capacity<sup>60</sup> and thus is not  
314 expected at depth. Increased abundances of *Crocospaera* co-occurred in the DCM  
315 of IO samples, which were additionally associated with the 5-20  $\mu\text{m}$  size fraction. We  
316 interpret these latter results as being indicative of the colonial and/or symbiotic life-  
317 histories previously reported for *Crocospaera* (Fig. 1; <sup>14,61</sup>). Unlike the phototrophic  
318 diazotrophs, the distribution of NCDs had no apparent depth partitioning in the  
319 epipelagic layer (Fig. 9c).

320

321 A relatively high number of *nifH* reads were detected in the mesopelagic (128 out of  
322 158 - or 81% - of mesopelagic samples, Supplementary Fig. S9). Although BNF and  
323 *nifH* expression has been previously reported at depths, most measurements have  
324 been made in oxygen minimum zones (OMZs; where low-oxygen waters are found)  
325 and oxygen-deficient zones (ODZs; where oxygen concentrations are low enough to  
326 induce anaerobic metabolisms)<sup>19,26</sup>, while here we mapped *nifH* sequences from  
327 many samples outside of OMZs and ODZs. For example, the highest diazotroph  
328 enrichment in the mesopelagic bacterioplankton was in SPO, NPO, NAO and SAO  
329 (Supplementary Fig. S9). Although the majority of *nifH* sequences correspond to  
330 proteobacteria, sequences from diazotrophic cyanobacteria were also detected in  
331 the mesopelagic (Supplementary Fig. S9). In particular, 44% of total *nifH* reads in  
332 mesopelagic samples at TARA\_78 and 6% at TARA\_76 (of 0.2-3  $\mu\text{m}$  size fraction )  
333 in SAO correspond exclusively to UCYN-A (Supplementary Fig. S9, Supplementary  
334 Table S1). In the surface samples of these stations we also detected high numbers  
335 of UCYN-A reads (Fig. 8; see below), suggesting a bloom at the surface. Most  
336 reports about UCYN-A have focused on their presence and activities in the sunlit  
337 layers, with the exception of a study reporting UCYN-A *nifH* sequences in shallow

28

29

338 water sediments of the north east Atlantic ocean (seafloor 38-76 m depth)<sup>62</sup>. Our  
339 observation of UCYN-A at 800 m depth in the open ocean suggests that this  
340 symbiosis could contribute to carbon export despite its small size.

341

#### 342 *Global ocean biogeography of diazotrophs*

343 We detected several regions with high densities or “hotspots” of diazotrophs (Figs. 4  
344 and 8). For example, the Mozambique Channel between Madagascar and the  
345 African continent, where diazotrophs constitute up to 30-40% of the bacterioplankton  
346 in the larger size fraction samples (TARA\_50 to TARA\_62; Figs. 4 and 8). Moreover,  
347 the confocal microscopy observations confirm higher densities of both  
348 *Trichodesmium* and symbiotic diazotrophs in this region (Fig. 2a). Another example  
349 is the SAO near South America (TARA\_76, TARA\_78 and TARA\_80), where UCYN-  
350 A reached 3-4% of the bacterioplankton population in the 0.8-5  $\mu\text{m}$  size fraction  
351 (Figs. 4 and 8). These zones from IO and SAO represent previously undersampled  
352 regions for diazotrophs (Supplementary Fig. S1), which also lacks quantitative rate  
353 measurements for  $\text{N}_2$  fixation<sup>22</sup>.

354

355 The highest abundance of free-living single-cell NCDs (0.2-3  $\mu\text{m}$  size fraction)  
356 corresponds to ~0.5% of the bacterioplankton in the wake of the Marquesas  
357 archipelago in the equatorial PO (TARA\_123; Fig. 8), where a surface planktonic  
358 bloom triggered by natural iron fertilization was recently reported<sup>63</sup>. Other high  
359 density areas corresponded to a few stations in the SPO (TARA\_98 and TARA\_99 in  
360 the surface and TARA\_102 at DCM), where high abundances of proteobacteria and  
361 planctomycetes (4-33% and 8-9%, respectively) were found in larger size fractions

30

31

362 (Fig. 8 and Supplementary Fig. S8), which likely results from association of NCDs to  
363 sinking particles. Moreover, TARA\_102 is located in the Peruvian upwelling area, a  
364 region previously reported for NCDs and/or BNF activity associated with the OMZ <sup>64-</sup>  
365 <sup>66</sup>. These results are congruent with recent reports from the subtropical Pacific of  
366 highly diverse NCDs, some associated with sinking particles <sup>20,66-68</sup>. We can therefore  
367 expand the distribution of potentially particle-associated NCDs to several other  
368 ocean basins (NAO, AO, IO). Our findings emphasize the dominance and  
369 persistence of NCDs in larger size fractions of both surface and DCM, which is novel  
370 and warrants further investigation.

371

372 Overall, many regions contain a low abundance of diazotrophs. For example, the  
373 percentages of diazotrophs in the AO, the Southern Ocean (SO), and the MS  
374 reached maximum values of only 0.4, 1, and 4%, respectively (Figs. 4c and 8). The  
375 highest diazotroph abundance in the AO corresponded to NCDs found in shallow  
376 waters (20-25 m depth) of the East Siberian Sea (TARA\_191; Fig. 4c and 8), a  
377 biologically undersampled region. Hence, like most plankton, diazotrophs are also  
378 largely 'patchy'.

379

380 *Cyanobacterial diazotrophs are mainly found as assemblies of abundant groups*

381 With the exception of a few stations in IO, RS, NPO and NAO where *Trichodesmium*  
382 was the main component of the mapped reads (Figs. 8 and 9b, Supplementary Fig.  
383 S10), there was a general and consistent trend of several cyanobacterial diazotrophs  
384 that co-occurred. This pattern of co-occurrence was present in several oceanic  
385 regions (Fig. 8 and Supplementary Fig. S10). For example, in the Red Sea (RS),  
386 diazotrophs were mainly found in the oligotrophic northern part (TARA\_32) (Fig. 8),

32

387 and consisted of the larger diameter diazotrophs (*Trichodesmium*, *Richelia*) co-  
388 occurring with the small unicells (UCYN-A, *Crocospaera*) (Fig. 8 and  
389 Supplementary Fig. S10). In fact, this additionally represents the first detection of  
390 UCYN-A in the RS, while the other cyanobacterial diazotrophs have been reported  
391 previously, including surface blooms of *Trichodesmium* spp.<sup>69–72</sup>. Co-occurring small  
392 and larger diameter diazotrophs dominated several stations in the southern IO,  
393 including two open ocean stations (TARA\_50, TARA\_51) where *Crocospaera* and  
394 UCYN-A1 dominated in the small size fraction and *Trichodesmium* was predominant  
395 in the three larger size fractions (5-20  $\mu\text{m}$ , 20-180  $\mu\text{m}$  and 180-200  $\mu\text{m}$ ) (Fig. 8 and  
396 Supplementary Fig. S10). A similar pattern was observed at station ALOHA in the  
397 subtropical Pacific Ocean (TARA\_131), consistent with previous observations<sup>73,74</sup>.  
398 On the contrary, only small diameter diazotrophs co-dominated in the SAO; for  
399 example UCYN-A1 and UCYN-A2 were very abundant at stations TARA\_76,  
400 TARA\_78 and TARA\_80 (Fig. 8 and Supplementary Fig. S10). The numerous  
401 observations of mixed diazotrophic assemblages of different life histories (colonial,  
402 free-living, symbiotic, particle associated) highlights the need to consider how these  
403 traits enable co-occurrence.

#### 404 *Ultrasmall diazotrophs consist of proteobacteria and are abundant in the Arctic* 405 *Ocean*

406 Ultrasmall prokaryotes are unusual due to their reduced cell volume (these cells can  
407 pass through 0.22- $\mu\text{m}$  filters, a size usually expected to exclude most  
408 microorganisms), and thus they are thought to have reduced genomes and to lack  
409 the proteins needed to carry out more complex metabolic processes. However, there  
410 is recent evidence that they do indeed participate in complex metabolisms<sup>75</sup>. In

411 order to see if they also contribute to marine nitrogen fixation, we carried out the  
412 analysis of 134 metagenomes of <0.22  $\mu\text{m}$  size fractionated samples of different  
413 water layers.

414 A total of 29 *nifH* sequences in our database mapped with at least 80% similarity to  
415 these metagenomes, retrieving a total of 42,409 mapped reads, almost all of them  
416 with high identity to proteobacterial *nifH* sequences. Of the 29 sequences, 6  
417 retrieved only one read. Mapped *nifH* reads were detected in slightly more than half  
418 of the samples (61% or 78 of 127), which highlights an unexpected broad distribution  
419 of ultrasmall diazotrophs (blue circles in Fig. 10a; Supplementary Table S1). Notably,  
420 when *nifH* reads were normalized by *recA* reads, we found that diazotrophs  
421 comprise up to 10% of the ultrasmall bacterioplankton, with the highest abundances  
422 detected in the Arctic Ocean, and in different water layers (Fig. 10a-b). This is  
423 remarkable considering that this is the ocean with the lowest diazotroph abundance  
424 in the other size fractions (Figs. 4c and 8, Supplementary Figs. S8 and S9).

425 The majority (86%) of the total recruited reads mapping to our *nifH* database  
426 corresponded to two sequences assembled from the <0.22  $\mu\text{m}$  size-fractionated  
427 metagenomes: OM-RGC.v2.008173703 and OM-RGC.v2.008955342. The former  
428 has 99% identity to *nifH* from the epsilon-proteobacterium *Arcobacter nitrofigilis*  
429 DSM7299<sup>76</sup> and only retrieved reads from surface and DCM (Fig. 10c). The second  
430 has close similarity to sequences from gamma-proteobacteria and it retrieved reads  
431 from different water layers (Fig. 10c). Both sequences also retrieved reads from  
432 other sizes fractions (Fig. 7 and Supplementary Fig. S11). In the case of *Arcobacter*,  
433 this is in agreement with the fact that the species of this genus are either symbionts  
434 or pathogens<sup>76</sup>, although its highest abundance is observed in the <0.22  $\mu\text{m}$  size  
435 fraction: it constitutes >9% of ultrasmall bacterioplankton in the DCM waters of

37

436 station TARA\_158 (Supplementary Fig. S11). In addition to these two abundant  
437 sequences detected in different size ranges, we found a proteobacterium sequence  
438 that exclusively retrieved reads from the <0.22  $\mu\text{m}$  size fractionated samples: OM-  
439 RGC.v2.008817394 (Supplementary Fig. S11). All in all, these results may prompt a  
440 fundamental revisit of marine nitrogen fixation and the incorporation of ultrasmall  
441 diazotrophs in ocean nitrogen cycle models.

442

## 443 **Conclusions**

444 This is the first attempt to assess the diversity, abundance, and distribution of  
445 diazotrophs at a global ocean scale using paired image and (PCR-free) molecular  
446 analyses. Unlike earlier studies, our work included the full biological and ecological  
447 complexity of diazotrophs: i.e. unicellular, colonial, symbiotic, cyanobacteria and  
448 NCDs. Our work also enabled estimates of total diazotrophic biovolume in several  
449 layers of the global ocean; information that is directly relevant to predicting C and N  
450 sources/sinks. Diazotrophs were found to be globally distributed and present in all  
451 size fractions, even among ultrasmall bacterioplankton (<0.22  $\mu\text{m}$ ), which were  
452 especially abundant in the Arctic Ocean. Unexpectedly, we detected sequences  
453 similar to obligate symbionts of freshwater diatoms nearly exclusively in the larger  
454 size fraction (20-180  $\mu\text{m}$ ). We interpret these results as evidence for a new  
455 symbiosis, given that their expected cell diameter is less than 5  $\mu\text{m}$ . We did not find  
456 strong evidence for widespread distributions for UCYNs, which was unexpected  
457 given the results from a decade of past observations (although we cannot discount  
458 the influence of seasonal sampling biases). On the contrary, the highest abundance  
459 of UCYN-A was restricted to an area of the SAO where we found UCYN-A at depth

38



39

460 and in surface samples, suggesting its significant contribution to carbon export, in  
461 spite of the small expected size of these symbiotic cells. A major conclusion from our  
462 work is the identification of new hotspots for diazotrophs in previously undersampled  
463 regions of the global ocean, for example, in several locations of the IO.  
464 Both the morphological and molecular data support the canonical view of  
465 *Trichodesmium* dominance, rather than more recent propositions that have  
466 emphasized the importance of UCYNs. The numerous observations of co-occurring  
467 diazotrophs suggests the need to consider another further paradigm shift, namely  
468 that the diverse life histories of diazotrophs (colonial, free-living, symbiotic, particle  
469 associated) could enable their co-occurrence in mixed assemblages and a collective  
470 contribution to the N budget. Overall, this work provides an updated composite of  
471 diazotroph biogeography in the global ocean, providing valuable information towards  
472 modeling in the context of global change and the substantial anthropogenic  
473 perturbations to the marine nitrogen cycle <sup>77</sup>.

474

## 475 **Methods**

### 476 ***Tara* Oceans sampling**

477 *Tara* Oceans performed a worldwide sampling of plankton between 2009 and 2013  
478 (Supplementary Fig. S1b). Three different water depths were sampled: surface (5 m  
479 depth), deep chlorophyll maximum (hereafter DCM; 17–188 m), and mesopelagic  
480 (200–1000 m) (Supplementary Fig. S2). The plankton were separated into discrete  
481 size fractions using a serial filtration system <sup>25</sup>. Given the inverse logarithmic  
482 relationship between plankton size and abundance <sup>25,78</sup>, higher seawater volumes  
483 were filtered for the larger size fractions (10-10<sup>5</sup> L; see Table 1 and Fig. 5 in <sup>25</sup>).

40



41

484 Taking into account that diazotrophs are less abundant than sympatric populations  
485 and have a wide size variation (Fig. 1), a comprehensive perspective requires  
486 analyses over a broad spectrum, which to date has been lacking. Five major  
487 organismal size fractions were collected: picoplankton (0.2 to 1.6  $\mu\text{m}$  or 0.2 to 3  $\mu\text{m}$ ;  
488 named here 0.2-1.6/3  $\mu\text{m}$  size fraction), piconanoplankton (0.8 to 5  $\mu\text{m}$  or 0.8 to  
489 2000  $\mu\text{m}$ ; named here 0.8-5  $\mu\text{m}$  size fraction), nanoplankton (5 to 20  $\mu\text{m}$  or 3 to 20  
490  $\mu\text{m}$ ; named here 5-20  $\mu\text{m}$  size fraction), microplankton (20 to 180  $\mu\text{m}$ ), and  
491 mesoplankton (180 to 2000  $\mu\text{m}$ ) (Supplementary Fig. S2) <sup>25</sup>. In addition, ultrasmall  
492 plankton (<0.22  $\mu\text{m}$ ) was also collected (Supplementary Fig. S2) <sup>25</sup>. The *Tara*  
493 Oceans datasets used in the present work are listed in Supplementary Fig. S2 and  
494 specific details about them and their analysis are described below.

#### 495 **Read recruitment of marker genes in metagenomes**

496 The use of metagenomes avoids the biases linked to the PCR amplification steps of  
497 metabarcoding methods, and thus it is better for quantitative observations. This is  
498 especially important for protein-coding gene markers, such as *nifH*, which display  
499 high variability in the third position of most codons, and thus necessitate the use of  
500 highly degenerate primers for a broad taxonomic coverage <sup>79</sup>. The detection of low-  
501 abundance organisms, such as diazotrophs, is facilitated by the deep sequencing of  
502 the *Tara* Oceans samples (between  $\sim 10^8$  and  $\sim 10^9$  total metagenomic reads per  
503 sample) <sup>26,28,29</sup>. The 1,326 metagenomes generated by the expedition are derived  
504 from 147 globally distributed stations and three different water layers: 745  
505 metagenomes from surface, 382 from DCM (17–188 m) and 41 from the bottom of  
506 the mixed layer when no DCM was observed (25-140 m), and 158 from mesopelagic  
507 (200–1000 m) (Supplementary Fig. S2).

42

43

508

509 The metagenomes were aligned against sequence catalogs of marker genes for  
510 diazotrophs (*nifH*) and bacteria (*recA*). The analysis was carried out using bwa tool  
511 version 0.7.4<sup>80</sup> using the following parameters: -minReadSize 70 -identity 80 -  
512 alignment 80 -complexityPercent 75 -complexityNumber 30. The *nifH* sequence  
513 catalog (hereafter *nifH* database) was composed of 41,229 publicly available  
514 sequences from the laboratory of JP Zehr (University of California, Santa Cruz, USA;  
515 version April 2014; <https://www.jzehrlab.com>) complemented with 21 additional *nifH*  
516 genes with less than 95% identity to those in the Zehr database retrieved from  
517 different *Tara* Oceans datasets: OM-Reference Gene Catalog version 2 (OM-RGC-  
518 v2,<sup>26</sup>), assemblies<sup>18</sup> and clones. Although the Zehr database has some redundancy  
519 (9,048 out of the 41,251 total sequences are retained when clustered at 95% identity  
520 using CDHIT-EST tool<sup>81</sup>), we decided to use the whole database to maximize the  
521 number of metagenomic mapping reads. The *recA* sequences were obtained from  
522 sequenced genomes in the Integrated Microbial Genome database (IMG)<sup>82</sup> and from  
523 OM-RGC-v2<sup>26</sup>. Homologous sequences were included in the two catalogs as  
524 outgroups to minimize false positive read alignments. They were retrieved from IMG,  
525 OM-RGC-v2 and the Marine Microbial Eukaryotic Transcriptome Sequencing Project  
526 (MMETSP<sup>83</sup>) using HMMer v3.2.1 with gathering threshold option  
527 (<http://hmmer.org/>). The outgroups for *recA* consisted of sequences coding for the  
528 RecA Pfam domain (PF00154) different from the canonical *recA* gene, which include  
529 those coding for RADA and RADB in archaea, RAD51 and DCM1 in eukaryotes, and  
530 UvsX in viruses<sup>84</sup>. Outgroups for *nifH* consisted of sequences coding for the Pfam  
531 domain Fer4\_NifH (PF00142) different from *nifH*, including those coding for a subunit

44

45

532 of the pigment biosynthesis complexes protochlorophyllide reductase and  
533 chlorophyllide reductase<sup>85</sup>.

534 We used the read abundance of the single-copy gene *recA* to estimate the total  
535 bacterial community in each sample (in contrast to the widely used 16S rRNA gene,  
536 which varies between one and fifteen copies among bacterial genomes;<sup>86,87</sup>). For  
537 simplicity, we assumed that *nifH* is also a single-copy gene, so the abundance ratio  
538 of *nifH/recA* provides an estimate for the relative contribution of diazotrophs to the  
539 total bacterial community. However, we realize that there are examples of 2-3 *nifH*  
540 copies in heterocyst-forming cyanobacteria such as *Anabaena variabilis* and  
541 *Fischerella* sp.<sup>88,89</sup>, or in the firmicutes *Clostridium pasteurianum*<sup>90</sup>, and that we are  
542 not taking into account the polyploidy effect observed for example in *Trichodesmium*  
543 spp.<sup>45</sup> and *Anabaena* spp.<sup>91,92</sup>.

#### 544 **Phylogenetic analysis of recruited metagenomic reads**

545 To support the taxonomic affiliation of metagenomic reads recruited by *nifH*  
546 sequences from ‘spheroid bodies’, we carried out a phylogenetic reconstruction in  
547 the following way. The translated metagenomic reads were aligned against a NifH  
548 reference alignment using the option --add of MAFFT version 6 with the G-INS-I  
549 strategy<sup>93</sup>. The resulting protein alignment was used for aligning the corresponding  
550 nucleotide sequences using TranslatorX<sup>94</sup> and phylogenetic trees were generated  
551 using the HKY85 substitution model in PhyML version 3.0<sup>95</sup>. Four categories of rate  
552 variation were used. The starting tree was a BIONJ tree and the type of tree  
553 improvement was subtree pruning and regrafting. Branch support was calculated  
554 using the approximate likelihood ratio test (aLRT) with a Shimodaira–Hasegawa-like  
555 (SH-like) procedure.

46

47

## 556 **Flow cytometry data and analysis**

557 Picoplankton samples were prepared for flow cytometry from three aliquots of 1 ml of  
558 seawater (pre-filtered through 200- $\mu\text{m}$  mesh), as described in <sup>27,96</sup>. For quantifying  
559 the densities of single-cell free-living diazotrophs, we combined the cell density  
560 measurements from flow cytometry with the relative abundances derived from  
561 molecular methods as done by Props et al. <sup>97</sup>. Specifically, we multiplied the bacterial  
562 concentration derived from flow cytometry by the *nifH* to *recA* ratio of metagenomic  
563 read abundances from samples of size fraction 0.22-1.6  $\mu\text{m}$  or 0.22-3  $\mu\text{m}$ . For  
564 biovolume estimations of single-cell free-living diazotrophs, we assumed an arbitrary  
565 average cell biovolume of 1  $\mu\text{m}^3$ .

## 566 **Detection of diazotrophs in the confocal laser-scanning microscopy dataset**

567 Quantitative microscopy was performed using eHCFM <sup>33</sup> on 61 samples collected  
568 using a microplankton net (20-180  $\mu\text{m}$  mesh size) at 48 different stations  
569 (Supplementary Fig. S2). Sample collection and preparation as well imaging  
570 acquisition is described in <sup>33</sup>. Briefly, samples were fixed on board *Tara* in 10%  
571 monomeric formaldehyde (1 % final concentration) buffered at pH 7.5 and 500  $\mu\text{l}$  EM  
572 grade glutaraldehyde (0.25% final concentration) and kept at 4 °C until analysis.  
573 Cells were imaged by Confocal Laser Scanning Microscopy (Leica Microsystem  
574 SP8, Leica Germany), equipped with an automated high-content imaging platform  
575 and several laser lines (405 nm, 488 nm, 552 nm, 638 nm). Automated images using  
576 the HCS A module of LSAF software (Leica Microsystem) and the water immersion  
577 lens HC PL APO 40x/1,10 mot CORR CS2 objective were scanned bidirectionally at  
578 600 Hz. Multiple fluorescent dyes were used to observe the cellular components of  
579 the organisms, including: the nuclei (blue, Hoechst, Ex405/Em420-470), cellular

48

49

580 membranes (green, DiOC6(3), Ex488/Em500-520), cell surface (cyan, AlexaFluor  
581 546, Ex552/Em560-590), and chlorophyll autofluorescence (red, Ex638/Em680-700).

582

583 We used the confocal microscopy data to quantify only the DDAs and  
584 *Trichodesmium* free filaments in terms of abundances and biovolume. Image  
585 detection and annotation was carried out using the Ecotaxa web platform <sup>98</sup> in the  
586 following way. We first manually searched for the target taxa and curated an initial  
587 training set in a few samples where molecular methods detected high abundances  
588 (i.e., high metagenomic read abundance of *nifH*), obtaining 53 images for DDAs and  
589 80 for *Trichodesmium* filaments. This training set was then used for machine  
590 learning automated recognition (random forest) based on a collection of 480 numeric  
591 2D/3D features <sup>33</sup>. The predictions were, in turn, manually curated and used as a  
592 new training set, repeating this step numerous times until no new images appeared.  
593 Other taxonomic groups were also annotated and used as outgroups to improve the  
594 predictions of our taxa of interest. Abundance estimates were normalized based on  
595 the total sample volumes as cells L<sup>-1</sup>. We used the major and minor axis of every  
596 image to calculate their ellipsoidal equivalent biovolume.

### 597 **Underwater Vision Profiler dataset and analysis**

598 The Underwater Vision Profiler 5 (UVP5, Hydroptics, France) <sup>35</sup> is an underwater  
599 imager mounted on the Rosette Vertical Sampling System. This system allows to  
600 illuminate precisely calibrated volumes of water and capture images at a rate of 5 to  
601 20 images s<sup>-1</sup> during the descent. The UVP5 was operated *in situ* and was designed  
602 to detect and count objects of >100 µm in length and to identify those of >600 µm in  
603 size. In the current work, we used this method for the quantification of

50

51

604 *Trichodesmium* colony abundance and biovolume. The search, curation and  
605 annotation of the corresponding images and their biovolume determination were  
606 carried out as described in the previous section.

#### 607 **Determination of contextual physicochemical parameters**

608 Measurements of temperature were recorded at the time of sampling using the  
609 vertical profile sampling system (CTD-rosette) and Niskin bottles following the  
610 sampling package described in <sup>99,100</sup>. Phosphate concentrations were determined  
611 using segmented flow analysis <sup>101</sup>. Nitrate concentrations were measured using a  
612 SATLANTIC ISUS nitrate sensor <sup>100</sup>. Iron levels were derived from a global ocean  
613 biogeochemical model <sup>102</sup>.

#### 614 **Plotting and statistical analysis**

615 All analyses were carried out in R language (<http://www.r-project.org/>). Graphs were  
616 plotted with R library *ggplot2* <sup>103</sup> and treemaps were generated with R library  
617 *treemap*. The trends between diazotroph abundance and latitude were displayed  
618 with generalized additive models using the *geom\_smooth* function of *ggplot2* <sup>103</sup>.  
619 Metric multidimensional scaling (NMDS) analysis to visualize Bray-Curtis distances  
620 was carried out with the *metaMDS* command in the R package *vegan* <sup>104</sup>, and the  
621 influence of environmental variables on sample ordination was evaluated with the  
622 function *envfit* in the same R package. Hierarchical agglomerative clustering of  
623 samples using average linkage was performed with the function *hclust* of the R  
624 package *stats*.

52

53

## 625 **Data availability**

626 Contextual data <sup>25</sup>: <https://doi.org/10.1594/PANGAEA.875582>; flow cytometry <sup>27,96</sup>:

627 <http://dx.doi.org/10.17632/p9r9wttjkm.1>; high throughput confocal microscopy

628 images <sup>33</sup> of 20-180 µm sized-fractionated samples:

629 <https://ecotaxa.obs-vlfr.fr/prj/2274>; UVP5 images <sup>35</sup>: <https://ecotaxa.obs-vlfr.fr/prj/579>.

630 *Tara* Oceans metagenomes <sup>26,28,29</sup> are archived at ENA under the accession

631 numbers: PRJEB1787, PRJEB1788, PRJEB4352, PRJEB4419, PRJEB9691,

632 PRJEB9740 and PRJEB9742.

## 633 **Acknowledgements.**

634 We would like to thank all colleagues from the *Tara* Oceans consortium as well as

635 the *Tara* Ocean Foundation for their inspirational vision. We also acknowledge the

636 laboratory of JP Zehr for public access to the *nifH* database, Daniel Lundin from

637 Linnaeus University for his analytical support and advice, Tom Delmont from

638 Genoscope for his useful discussions, Flora Vincent from Weizmann Institute of

639 Science for her help with Ecotaxa resource, Eric Bapteste, Philippe Lopez and

640 Romain Lannes from Sorbonne Université for their advice with ultrasmall bacteria

641 analysis. This work has been supported by the FFEM - French Facility for Global

642 Environment, French Government 'Investissements d'Avenir' programmes

643 OCEANOMICS (ANR-11-BTBR-0008), FRANCE GENOMIQUE (ANR-10-INBS-09-

644 08), MEMO LIFE (ANR-10-LABX-54), and PSL Research University (ANR-11-IDEX-

645 0001-02). R.A.F. acknowledges funding from Knut and Alice Wallenberg foundation.

646 C.B. acknowledges funding from the European Research Council (ERC) under the

647 European Union's Horizon 2020 research and innovation programme (Diatomic;

648 grant agreement No. 835067) and Agence Nationale de la Recherche "Phytomet"

54

55

649 (ANR-16-CE01-0008) projects. J.J.P.K. acknowledges postdoctoral funding from the  
650 Fonds Français pour l'Environnement Mondial. This article is contribution number \*\*  
651 of *Tara Oceans*.

652 **Author contributions**

653 RAF and CB designed the study and supervised the project. RAF, CB and JJPK  
654 wrote the paper with substantial input from CdV, FL, PW, EP and MP. EP performed  
655 the metagenomic mapping. RP and EK set up the imaging platform for the e-HFCM  
656 data generation and processing. JJPK, MC, ED, FL, SC performed the taxonomic  
657 annotation of the e-HFCM dataset of 20-180  $\mu\text{m}$  size-fractionated samples. MP  
658 performed the collection and taxonomic annotation of UVP5 dataset. JJPK  
659 performed the formal analysis and visualization.

660

661 **Competing financial interests:** The authors declare no competing financial  
662 interests.

56



663 References

- 664 1. Field, C. B., Behrenfeld, M. J., Randerson, J. T. & Falkowski, P. Primary  
665 production of the biosphere: integrating terrestrial and oceanic components.  
666 *Science* **281**, 237–240 (1998).
- 667 2. Moore, C. M. *et al.* Processes and patterns of oceanic nutrient limitation. *Nature*  
668 *Geoscience* vol. 6 701–710 (2013).
- 669 3. Tyrrell, T. The relative influences of nitrogen and phosphorus on oceanic  
670 primary production. *Nature* vol. 400 525–531 (1999).
- 671 4. Falkowski, P. G. Evolution of the nitrogen cycle and its influence on the  
672 biological sequestration of CO<sub>2</sub> in the ocean. *Nature* vol. 387 272–275 (1997).
- 673 5. Karl, D. *et al.* The role of nitrogen fixation in biogeochemical cycling in the  
674 subtropical North Pacific Ocean. *Nature* vol. 388 533–538 (1997).
- 675 6. Capone, D. G. *et al.* Nitrogen fixation by *Trichodesmium* spp.: An important  
676 source of new nitrogen to the tropical and subtropical North Atlantic Ocean.  
677 *Global Biogeochemical Cycles* vol. 19 (2005).
- 678 7. Capone, D. G. *Trichodesmium*, a Globally Significant Marine Cyanobacterium.  
679 *Science* **276**, 1221–1229 (1997).
- 680 8. Moisander, P. H. *et al.* Unicellular Cyanobacterial Distributions Broaden the  
681 Oceanic N<sub>2</sub> Fixation Domain. *Science* vol. 327 1512–1514 (2010).
- 682 9. Zehr, J. P., Shilova, I. N., Farnelid, H. M., Muñoz-Marín, M. D. C. & Turk-Kubo,  
683 K. A. Unusual marine unicellular symbiosis with the nitrogen-fixing  
684 cyanobacterium UCYN-A. *Nat Microbiol* **2**, 16214 (2016).
- 685 10. Hagino, K., Onuma, R., Kawachi, M. & Horiguchi, T. Discovery of an  
686 endosymbiotic nitrogen-fixing cyanobacterium UCYN-A in *Braarudosphaera*

- 687 bigelowii (Prymnesiophyceae). *PLoS One* **8**, e81749 (2013).
- 688 11. Thompson, A. W. *et al.* Unicellular Cyanobacterium Symbiotic with a Single-  
689 Celled Eukaryotic Alga. *Science* vol. 337 1546–1550 (2012).
- 690 12. Farnelid, H., Turk-Kubo, K., Muñoz-Marín, M. C. & Zehr, J. P. New insights into  
691 the ecology of the globally significant uncultured nitrogen-fixing symbiont UCYN-  
692 *A*. *Aquatic Microbial Ecology* vol. 77 125–138 (2016).
- 693 13. Cornejo-Castillo, F. M. *et al.* UCYN-A3, a newly characterized open ocean  
694 sublineage of the symbiotic N<sub>2</sub> -fixing cyanobacterium Candidatus  
695 *Atelocyanobacterium thalassa*. *Environmental Microbiology* vol. 21 111–124  
696 (2019).
- 697 14. Carpenter, E. J. & Janson, S. INTRACELLULAR CYANOBACTERIAL  
698 SYMBIONTS IN THE MARINE DIATOM CLIMACODIUM FRAUENFELDIANUM  
699 (BACILLARIOPHYCEAE). *J. Phycol.* **36**, 540–544 (2000).
- 700 15. Webb, E. A., Ehrenreich, I. M., Brown, S. L., Valois, F. W. & Waterbury, J. B.  
701 Phenotypic and genotypic characterization of multiple strains of the diazotrophic  
702 cyanobacterium, *Crocospaera watsonii*, isolated from the open ocean. *Environ.*  
703 *Microbiol.* **11**, 338–348 (2009).
- 704 16. Caputo, A., Nylander, J. A. A. & Foster, R. A. The genetic diversity and evolution  
705 of diatom-diazotroph associations highlights traits favoring symbiont integration.  
706 *FEMS Microbiol. Lett.* **366**, (2019).
- 707 17. Foster, R. A. *et al.* Influence of the Amazon River plume on distributions of free-  
708 living and symbiotic cyanobacteria in the western tropical north Atlantic Ocean.  
709 *Limnology and Oceanography* vol. 52 517–532 (2007).
- 710 18. Delmont, T. O. *et al.* Nitrogen-fixing populations of Planctomycetes and  
711 Proteobacteria are abundant in surface ocean metagenomes. *Nat Microbiol* **3**,

61

- 712 804–813 (2018).
- 713 19. Moisander, P. H. *et al.* Chasing after Non-cyanobacterial Nitrogen Fixation in  
714 Marine Pelagic Environments. *Front. Microbiol.* **8**, 1736 (2017).
- 715 20. Farnelid, H. *et al.* Nitrogenase gene amplicons from global marine surface  
716 waters are dominated by genes of non-cyanobacteria. *PLoS One* **6**, e19223  
717 (2011).
- 718 21. Halm, H. *et al.* Heterotrophic organisms dominate nitrogen fixation in the South  
719 Pacific Gyre. *The ISME Journal* vol. 6 1238–1249 (2012).
- 720 22. Luo, Y.-W. *et al.* Database of diazotrophs in global ocean: abundance, biomass  
721 and nitrogen fixation rates. (2012) doi:10.5194/essd-4-47-2012.
- 722 23. Tang, W. & Cassar, N. Data-Driven Modeling of the Distribution of Diazotrophs  
723 in the Global Ocean. *Geophysical Research Letters* vol. 46 12258–12269  
724 (2019).
- 725 24. Bork, P. *et al.* Tara Oceans. Tara Oceans studies plankton at planetary scale.  
726 Introduction. *Science* **348**, 873 (2015).
- 727 25. Pesant, S. *et al.* Open science resources for the discovery and analysis of Tara  
728 Oceans data. *Sci Data* **2**, 150023 (2015).
- 729 26. Salazar, G. *et al.* Gene Expression Changes and Community Turnover  
730 Differentially Shape the Global Ocean Metatranscriptome. *Cell* **179**, 1068–  
731 1083.e21 (2019).
- 732 27. Sunagawa, S. *et al.* Ocean plankton. Structure and function of the global ocean  
733 microbiome. *Science* **348**, 1261359 (2015).
- 734 28. Alberti, A. *et al.* Viral to metazoan marine plankton nucleotide sequences from  
735 the Tara Oceans expedition. *Sci Data* **4**, 170093 (2017).
- 736 29. Carradec, Q. *et al.* A global ocean atlas of eukaryotic genes. *Nat. Commun.* **9**,

62

- 737 373 (2018).
- 738 30. Cornejo-Castillo, F. M. *et al.* Cyanobacterial symbionts diverged in the late  
739 Cretaceous towards lineage-specific nitrogen fixation factories in single-celled  
740 phytoplankton. *Nat. Commun.* **7**, 11071 (2016).
- 741 31. Cornejo-Castillo, F. M. & Zehr, J. P. Intriguing size distribution of the uncultured  
742 and globally widespread marine non-cyanobacterial diazotroph Gamma-A. *The*  
743 *ISME Journal* (2020) doi:10.1038/s41396-020-00765-1.
- 744 32. Vorobev, A. *et al.* Transcriptome reconstruction and functional analysis of  
745 eukaryotic marine plankton communities via high-throughput metagenomics and  
746 metatranscriptomics. *Genome Res.* (2020) doi:10.1101/gr.253070.119.
- 747 33. Colin, S. *et al.* Quantitative 3D-imaging for cell biology and ecology of  
748 environmental microbial eukaryotes. *Elife* **6**, (2017).
- 749 34. Cabello, A. M. *et al.* Global distribution and vertical patterns of a  
750 prymnesiophyte-cyanobacteria obligate symbiosis. *ISME J.* **10**, 693–706 (2016).
- 751 35. Picheral, M. *et al.* The Underwater Vision Profiler 5: An advanced instrument for  
752 high spatial resolution studies of particle size spectra and zooplankton.  
753 *Limnology and Oceanography: Methods* vol. 8 462–473 (2010).
- 754 36. Gómez, F., Furuya, K. & Takeda, S. Distribution of the cyanobacterium *Richelia*  
755 *intracellularis* as an epiphyte of the diatom *Chaetoceros compressus* in the  
756 western Pacific Ocean. *Journal of Plankton Research* vol. 27 323–330 (2005).
- 757 37. Villareal, T. A. Laboratory Culture and Preliminary Characterization of the  
758 Nitrogen-Fixing *Rhizosolenia-Richelia* Symbiosis. *Marine Ecology* vol. 11 117–  
759 132 (1990).
- 760 38. Foster, R. A., Goebel, N. L. & Zehr, J. P. ISOLATION OF CALOTHRIX  
761 RHIZOSOLENIAE (CYANOBACTERIA) STRAIN SC01 FROM CHAETOCEROS

- 762 (BACILLARIOPHYTA) SPP. DIATOMS OF THE SUBTROPICAL NORTH  
763 PACIFIC OCEAN1. *Journal of Phycology* vol. 46 1028–1037 (2010).
- 764 39. Karl, D. M., Church, M. J., Dore, J. E., Letelier, R. M. & Mahaffey, C. Predictable  
765 and efficient carbon sequestration in the North Pacific Ocean supported by  
766 symbiotic nitrogen fixation. *Proceedings of the National Academy of Sciences*  
767 vol. 109 1842–1849 (2012).
- 768 40. Scharek, R., Tupas, L. M. & Karl, D. M. Diatom fluxes to the deep sea in the  
769 oligotrophic North Pacific gyre at Station ALOHA. *Mar. Ecol. Prog. Ser.* **182**, 55–  
770 67 (1999).
- 771 41. Scharek, R., Latasa, M., Karl, D. M. & Bidigare, R. R. Temporal variations in  
772 diatom abundance and downward vertical flux in the oligotrophic North Pacific  
773 gyre. *Deep Sea Research Part I: Oceanographic Research Papers* vol. 46  
774 1051–1075 (1999).
- 775 42. Ratten, J.-M. *et al.* Sources of iron and phosphate affect the distribution of  
776 diazotrophs in the North Atlantic. *Deep Sea Research Part II: Topical Studies in*  
777 *Oceanography* vol. 116 332–341 (2015).
- 778 43. Tzubarí, Y., Magnezi, L., Be'er, A. & Berman-Frank, I. Iron and phosphorus  
779 deprivation induce sociality in the marine bloom-forming cyanobacterium  
780 *Trichodesmium*. *ISME J.* **12**, 1682–1693 (2018).
- 781 44. Geisler, E., Bogler, A., Rahav, E. & Bar-Zeev, E. Direct Detection of  
782 Heterotrophic Diazotrophs Associated with Planktonic Aggregates. *Scientific*  
783 *Reports* vol. 9 (2019).
- 784 45. Sargent, E. C. *et al.* Evidence for polyploidy in the globally important  
785 diazotroph *Trichodesmium*. *FEMS Microbiology Letters* vol. 363 fnw244 (2016).
- 786 46. Foster, R. A. & Zehr, J. P. Diversity, Genomics, and Distribution of

- 787 Phytoplankton-Cyanobacterium Single-Cell Symbiotic Associations. *Annu. Rev.*  
788 *Microbiol.* **73**, 435–456 (2019).
- 789 47. Tripp, H. J. *et al.* Metabolic streamlining in an open-ocean nitrogen-fixing  
790 cyanobacterium. *Nature* vol. 464 90–94 (2010).
- 791 48. Scavotto, R. E., Dziallas, C., Bentzon-Tilia, M., Riemann, L. & Moisander, P. H.  
792 Nitrogen-fixing bacteria associated with copepods in coastal waters of the North  
793 Atlantic Ocean. *Environ. Microbiol.* **17**, 3754–3765 (2015).
- 794 49. Nakayama, T. *et al.* Complete genome of a nonphotosynthetic cyanobacterium  
795 in a diatom reveals recent adaptations to an intracellular lifestyle. *Proceedings*  
796 *of the National Academy of Sciences* vol. 111 11407–11412 (2014).
- 797 50. Drum, R. W. & Pankratz, S. Fine structure of an unusual cytoplasmic inclusion in  
798 the diatom genus, *Rhopalodia*. *Protoplasma* vol. 60 141–149 (1965).
- 799 51. Nakayama, T. & Inagaki, Y. Genomic divergence within non-photosynthetic  
800 cyanobacterial endosymbionts in rhopalodiacean diatoms. *Sci. Rep.* **7**, 13075  
801 (2017).
- 802 52. Prechtel, J., Kneip, C., Lockhart, P., Wenderoth, K. & Maier, U.-G. Intracellular  
803 Spheroid Bodies of *Rhopalodia gibba* Have Nitrogen-Fixing Apparatus of  
804 Cyanobacterial Origin. *Molecular Biology and Evolution* vol. 21 1477–1481  
805 (2004).
- 806 53. Patrick, R. & Reimer, C. W. *The Diatoms of the United States: Exclusive of*  
807 *Alaska and Hawaii. Volume 2, Part 1, Entomoneidaceae, Cymbellaceae,*  
808 *Gomphonemaceae, Epithemiaceae.* (1975).
- 809 54. Dutkiewicz, S., Ward, B. A., Monteiro, F. & Follows, M. J. Interconnection of  
810 nitrogen fixers and iron in the Pacific Ocean: Theory and numerical simulations.  
811 *Global Biogeochemical Cycles* vol. 26 (2012).

- 812 55. Deutsch, C., Sarmiento, J. L., Sigman, D. M., Gruber, N. & Dunne, J. P. Spatial  
813 coupling of nitrogen inputs and losses in the ocean. *Nature* vol. 445 163–167  
814 (2007).
- 815 56. Mills, M. M., Ridame, C., Davey, M., La Roche, J. & Geider, R. J. Iron and  
816 phosphorus co-limit nitrogen fixation in the eastern tropical North Atlantic.  
817 *Nature* vol. 429 292–294 (2004).
- 818 57. Raven, J. A. The iron and molybdenum use efficiencies of plant growth with  
819 different energy, carbon and nitrogen sources. *New Phytologist* vol. 109 279–  
820 287 (1988).
- 821 58. Kustka, A. B. *et al.* Iron requirements for dinitrogen- and ammonium-supported  
822 growth in cultures of *Trichodesmium* (IMS 101): Comparison with nitrogen fixation  
823 rates and iron: carbon ratios of field populations. *Limnology and Oceanography*  
824 vol. 48 1869–1884 (2003).
- 825 59. Subramaniam, A. *et al.* Amazon River enhances diazotrophy and carbon  
826 sequestration in the tropical North Atlantic Ocean. *Proc. Natl. Acad. Sci. U. S. A.*  
827 **105**, 10460–10465 (2008).
- 828 60. Bar-Zeev, E., Avishay, I., Bidle, K. D. & Berman-Frank, I. Programmed cell  
829 death in the marine cyanobacterium *Trichodesmium* mediates carbon and  
830 nitrogen export. *ISME J.* **7**, 2340–2348 (2013).
- 831 61. Foster, R. A., Szejtjenszus, S. & Kuypers, M. M. M. Measuring carbon and  
832 N<sub>2</sub> fixation in field populations of colonial and free-living unicellular  
833 cyanobacteria using nanometer-scale secondary ion mass spectrometry<sup>1</sup>.  
834 *Journal of Phycology* vol. 49 502–516 (2013).
- 835 62. Brown, S. M. & Jenkins, B. D. Profiling gene expression to distinguish the likely  
836 active diazotrophs from a sea of genetic potential in marine sediments.



- 837 *Environmental Microbiology* vol. 16 3128–3142 (2014).
- 838 63. Caputi, L. *et al.* Community-Level Responses to Iron Availability in Open Ocean  
839 Plankton Ecosystems. *Global Biogeochem. Cycles* **33**, 391–419 (2019).
- 840 64. Loescher, C. R. *et al.* Facets of diazotrophy in the oxygen minimum zone waters  
841 off Peru. *The ISME Journal* vol. 8 2180–2192 (2014).
- 842 65. Fernandez, C., Farías, L. & Ulloa, O. Nitrogen fixation in denitrified marine  
843 waters. *PLoS One* **6**, e20539 (2011).
- 844 66. Jayakumar, A., Al-Rshaidat, M. M. D., Ward, B. B. & Mulholland, M. R. Diversity,  
845 distribution, and expression of diazotroph nifH genes in oxygen-deficient waters  
846 of the Arabian Sea. *FEMS Microbiol. Ecol.* **82**, 597–606 (2012).
- 847 67. Turk-Kubo, K. A., Karamchandani, M., Capone, D. G. & Zehr, J. P. The paradox  
848 of marine heterotrophic nitrogen fixation: abundances of heterotrophic  
849 diazotrophs do not account for nitrogen fixation rates in the Eastern Tropical  
850 South Pacific. *Environ. Microbiol.* **16**, 3095–3114 (2014).
- 851 68. Jayakumar, A. *et al.* Biological nitrogen fixation in the oxygen-minimum region of  
852 the eastern tropical North Pacific ocean. *ISME J.* **11**, 2356–2367 (2017).
- 853 69. Kimor, B. & Golandsky, B. Microplankton of the Gulf of Elat: Aspects of seasonal  
854 and bathymetric distribution. *Marine Biology* vol. 42 55–67 (1977).
- 855 70. Gordon, N., Angel, D. L., Neorl, A., Kress, N. & Kimor, B. Heterotrophic  
856 dinoflagellates with symbiotic cyanobacteria and nitrogen limitation in the Gulf of  
857 Aqaba. *Marine Ecology Progress Series* vol. 107 83–88 (1994).
- 858 71. Post, A. F. *et al.* Spatial and temporal distribution of *Trichodesmium* spp. in the  
859 stratified Gulf of Aqaba, Red Sea. *Marine Ecology Progress Series* vol. 239  
860 241–250 (2002).
- 861 72. Foster, R. A., Paytan, A. & Zehr, J. P. Seasonality of N<sub>2</sub> fixation and nifH gene



- 862 diversity in the Gulf of Aqaba (Red Sea). *Limnology and Oceanography* vol. 54  
863 219–233 (2009).
- 864 73. Church, M. J., Short, C. M., Jenkins, B. D., Karl, D. M. & Zehr, J. P. Temporal  
865 patterns of nitrogenase gene (*nifH*) expression in the oligotrophic North Pacific  
866 Ocean. *Appl. Environ. Microbiol.* **71**, 5362–5370 (2005).
- 867 74. Zehr, J. P. & Capone, D. G. Changing perspectives in marine nitrogen fixation.  
868 *Science* **368**, (2020).
- 869 75. Lannes, R., Olsson-Francis, K., Lopez, P. & Baptiste, E. Carbon Fixation by  
870 Marine Ultrasmall Prokaryotes. *Genome Biol. Evol.* **11**, 1166–1177 (2019).
- 871 76. Pati, A. *et al.* Complete genome sequence of *Arcobacter nitrofigilis* type strain  
872 (CI). *Stand. Genomic Sci.* **2**, 300–308 (2010).
- 873 77. Kim, I.-N. *et al.* Chemical oceanography. Increasing anthropogenic nitrogen in  
874 the North Pacific Ocean. *Science* **346**, 1102–1106 (2014).
- 875 78. Belgrano, A., Allen, A. P., Enquist, B. J. & Gillooly, J. F. Allometric scaling of  
876 maximum population density: a common rule for marine phytoplankton and  
877 terrestrial plants. *Ecology Letters* vol. 5 611–613 (2002).
- 878 79. Gaby, J. C. & Buckley, D. H. The Use of Degenerate Primers in qPCR Analysis  
879 of Functional Genes Can Cause Dramatic Quantification Bias as Revealed by  
880 Investigation of *nifH* Primer Performance. *Microbial Ecology* vol. 74 701–708  
881 (2017).
- 882 80. Li, H. & Durbin, R. Fast and accurate short read alignment with Burrows-  
883 Wheeler transform. *Bioinformatics* vol. 25 1754–1760 (2009).
- 884 81. Fu, L., Niu, B., Zhu, Z., Wu, S. & Li, W. CD-HIT: accelerated for clustering the  
885 next-generation sequencing data. *Bioinformatics* **28**, 3150–3152 (2012).
- 886 82. Chen, I.-M. A. *et al.* IMG/M v.5.0: an integrated data management and

- 887 comparative analysis system for microbial genomes and microbiomes. *Nucleic*  
888 *Acids Res.* **47**, D666–D677 (2019).
- 889 83. Keeling, P. J. *et al.* The Marine Microbial Eukaryote Transcriptome Sequencing  
890 Project (MMETSP): illuminating the functional diversity of eukaryotic life in the  
891 oceans through transcriptome sequencing. *PLoS Biol.* **12**, e1001889 (2014).
- 892 84. Lin, Z., Kong, H., Nei, M. & Ma, H. Origins and evolution of the recA/RAD51  
893 gene family: evidence for ancient gene duplication and endosymbiotic gene  
894 transfer. *Proc. Natl. Acad. Sci. U. S. A.* **103**, 10328–10333 (2006).
- 895 85. Fujita, Y. & Bauer, C. E. Reconstitution of light-independent protochlorophyllide  
896 reductase from purified bchl and BchN-BchB subunits. In vitro confirmation of  
897 nitrogenase-like features of a bacteriochlorophyll biosynthesis enzyme. *J. Biol.*  
898 *Chem.* **275**, 23583–23588 (2000).
- 899 86. Kembel, S. W., Wu, M., Eisen, J. A. & Green, J. L. Incorporating 16S gene copy  
900 number information improves estimates of microbial diversity and abundance.  
901 *PLoS Comput. Biol.* **8**, e1002743 (2012).
- 902 87. Angly, F. E. *et al.* CopyRighter: a rapid tool for improving the accuracy of  
903 microbial community profiles through lineage-specific gene copy number  
904 correction. *Microbiome* **2**, 11 (2014).
- 905 88. Zehr, J. P., Mellon, M. T. & Hiorns, W. D. Phylogeny of cyanobacterial nifH  
906 genes: evolutionary implications and potential applications to natural  
907 assemblages. *Microbiology* **143 ( Pt 4)**, 1443–1450 (1997).
- 908 89. Thiel, T. & Pratte, B. S. Regulation of Three Nitrogenase Gene Clusters in the  
909 Cyanobacterium *Anabaena variabilis* ATCC 29413. *Life* **4**, 944–967 (2014).
- 910 90. Langlois, R. J., Hümmer, D. & LaRoche, J. Abundances and distributions of the  
911 dominant nifH phylotypes in the Northern Atlantic Ocean. *Appl. Environ.*

- 912 *Microbiol.* **74**, 1922–1931 (2008).
- 913 91. Simon, R. D. Macromolecular Composition of Spores from the Filamentous  
914 Cyanobacterium *Anabaena cylindrica*. *Journal of Bacteriology* vol. 129 1154–  
915 1155 (1977).
- 916 92. Simon, R. D. DNA content of heterocysts and spores of the filamentous  
917 cyanobacterium *Anabaena variabilis*. *FEMS Microbiology Letters* vol. 8 241–245  
918 (1980).
- 919 93. Katoh, K. & Toh, H. Improved accuracy of multiple ncRNA alignment by  
920 incorporating structural information into a MAFFT-based framework. *BMC*  
921 *Bioinformatics* **9**, 212 (2008).
- 922 94. Abascal, F., Zardoya, R. & Telford, M. J. TranslatorX: multiple alignment of  
923 nucleotide sequences guided by amino acid translations. *Nucleic Acids Res.* **38**,  
924 W7–13 (2010).
- 925 95. Guindon, S. *et al.* New algorithms and methods to estimate maximum-likelihood  
926 phylogenies: assessing the performance of PhyML 3.0. *Syst. Biol.* **59**, 307–321  
927 (2010).
- 928 96. Hingamp, P. *et al.* Exploring nucleo-cytoplasmic large DNA viruses in Tara  
929 Oceans microbial metagenomes. *ISME J.* **7**, 1678–1695 (2013).
- 930 97. Props, R. *et al.* Absolute quantification of microbial taxon abundances. *ISME J.*  
931 **11**, 584–587 (2017).
- 932 98. Picheral, M., Colin, S. & Irisson, J.-O. EcoTaxa, a tool for the taxonomic  
933 classification of images. <http://ecotaxa.obs-vlfr.fr> (2017).
- 934 99. Website. Picheral, Marc; Searson, Sarah; Taillandier, Vincent; Bricaud, Annick;  
935 Boss, Emmanuel; Ras, Josephine; Claustre, Hervé; Ouhssain, Mustapha; Morin,  
936 Pascal; Tremblay, Jean-Éric; Coppola, Laurent; Gattuso, Jean-Pierre; Metzl,

79

- 937 Nicolas; Thuillier, Doris; Gorsky, Gabriel; Tara Oceans Consortium,  
938 Coordinators; Tara Oceans Expedition, Participants (2014): Vertical profiles of  
939 environmental parameters measured on discrete water samples collected with  
940 Niskin bottles during the Tara Oceans expedition 2009-2013. PANGAEA, <https://doi.org/10.1594/PANGAEA.836319>.  
941
- 942 100.Website. Picheral, Marc; Searson, Sarah; Taillandier, Vincent; Bricaud, Annick;  
943 Boss, Emmanuel; Stemmann, Lars; Gorsky, Gabriel; Tara Oceans Consortium,  
944 Coordinators; Tara Oceans Expedition, Participants (2014): Vertical profiles of  
945 environmental parameters measured from physical, optical and imaging sensors  
946 during Tara Oceans expedition 2009-2013. PANGAEA,  
947 <https://doi.org/10.1594/PANGAEA.836321>.
- 948 101.Practical Guidelines for the Analysis of Seawater. (2009)  
949 [doi:10.1201/9781420073072](https://doi.org/10.1201/9781420073072).
- 950 102.Aumont, O., Ethé, C., Tagliabue, A., Bopp, L. & Gehlen, M. PISCES-v2: an  
951 ocean biogeochemical model for carbon and ecosystem studies. *Geoscientific*  
952 *Model Development* vol. 8 2465–2513 (2015).
- 953 103.Wickham, H. *ggplot2: Elegant Graphics for Data Analysis*. (Springer Science &  
954 Business Media, 2009).
- 955 104.Oksanen, J. *et al.* vegan: Community Ecology Package. [https://cran.r-](https://cran.r-project.org/web/packages/vegan/index.html)  
956 [project.org/web/packages/vegan/index.html](https://cran.r-project.org/web/packages/vegan/index.html) (2019).

957

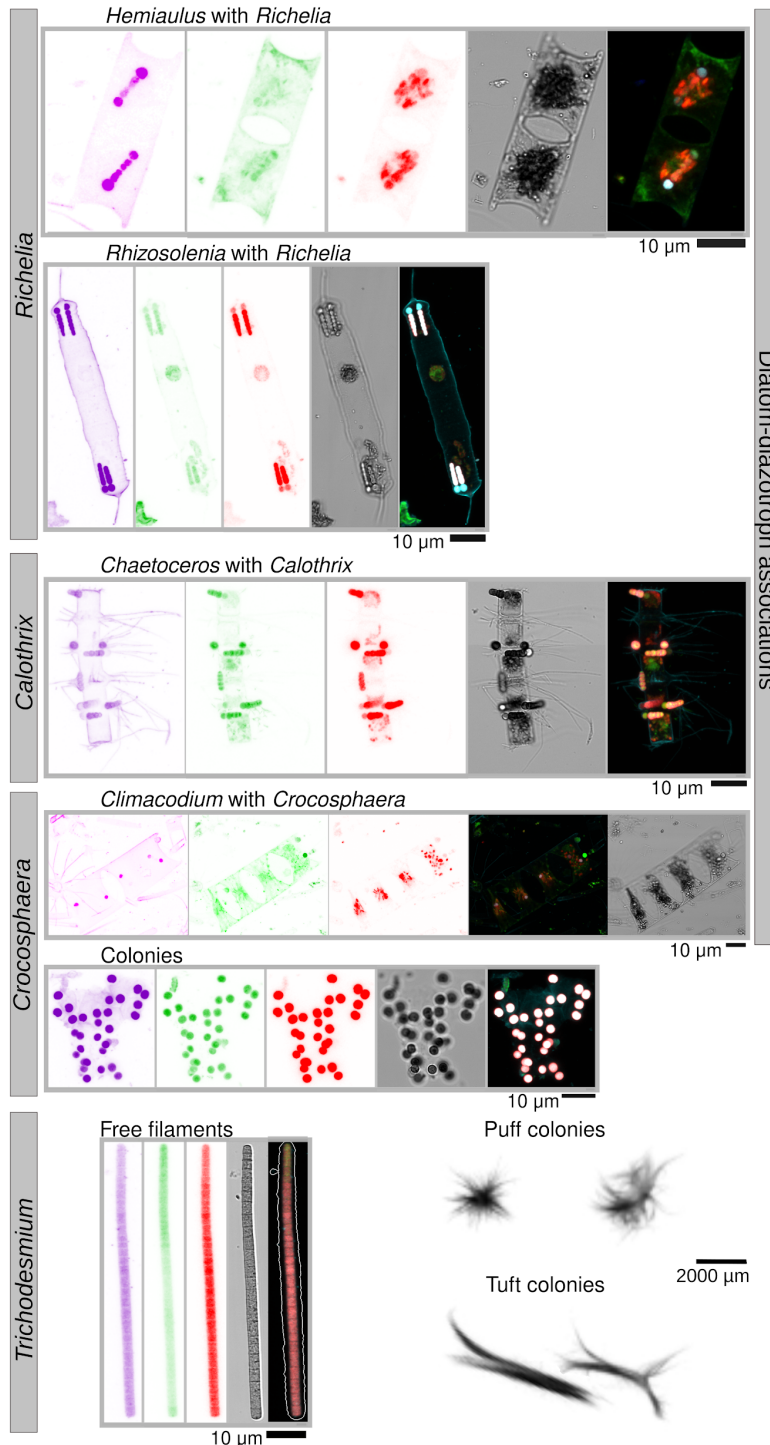

958  
 959 **Figure 1:** Imaging observations of diazotrophs in *Tara* Oceans samples. Images were obtained by  
 960 environmental High Content Fluorescence Microscopy (eHCFM; Colin et al., 2017), with the exception  
 961 of *Trichodesmium* colonies, which were detected in situ using an Underwater Vision Profiler 5 (UVP5;  
 962 Picheral et al., 2010). From left to right, the displayed channels for each micrograph correspond to cell  
 963 surface (cyan, AlexaFluor 546), cellular membranes (green, DiOC6), chlorophyll autofluorescence  
 964 (red), the bright field, and the merged channels. The displayed *Hemiaulus-Richelia* association was  
 965 detected at station TARA\_80 in the South Atlantic Ocean, *Rhizosolenia-Richelia* at TARA\_53 in the  
 966 Indian Ocean, *Chaetoceros-Calothrix* at TARA\_131 (ALOHA) in the North Pacific Ocean,  
 967 *Climacodium-Crocospaera* at TARA\_140 in the North Pacific Ocean, the *Crocospaera*-like colony  
 968 at TARA\_53 in the Indian Ocean, the *Trichodesmium* filament at TARA\_42 in the Indian Ocean, and  
 969 the *Trichodesmium* colonies at TARA\_141 and TARA\_142 in the North Atlantic Ocean.

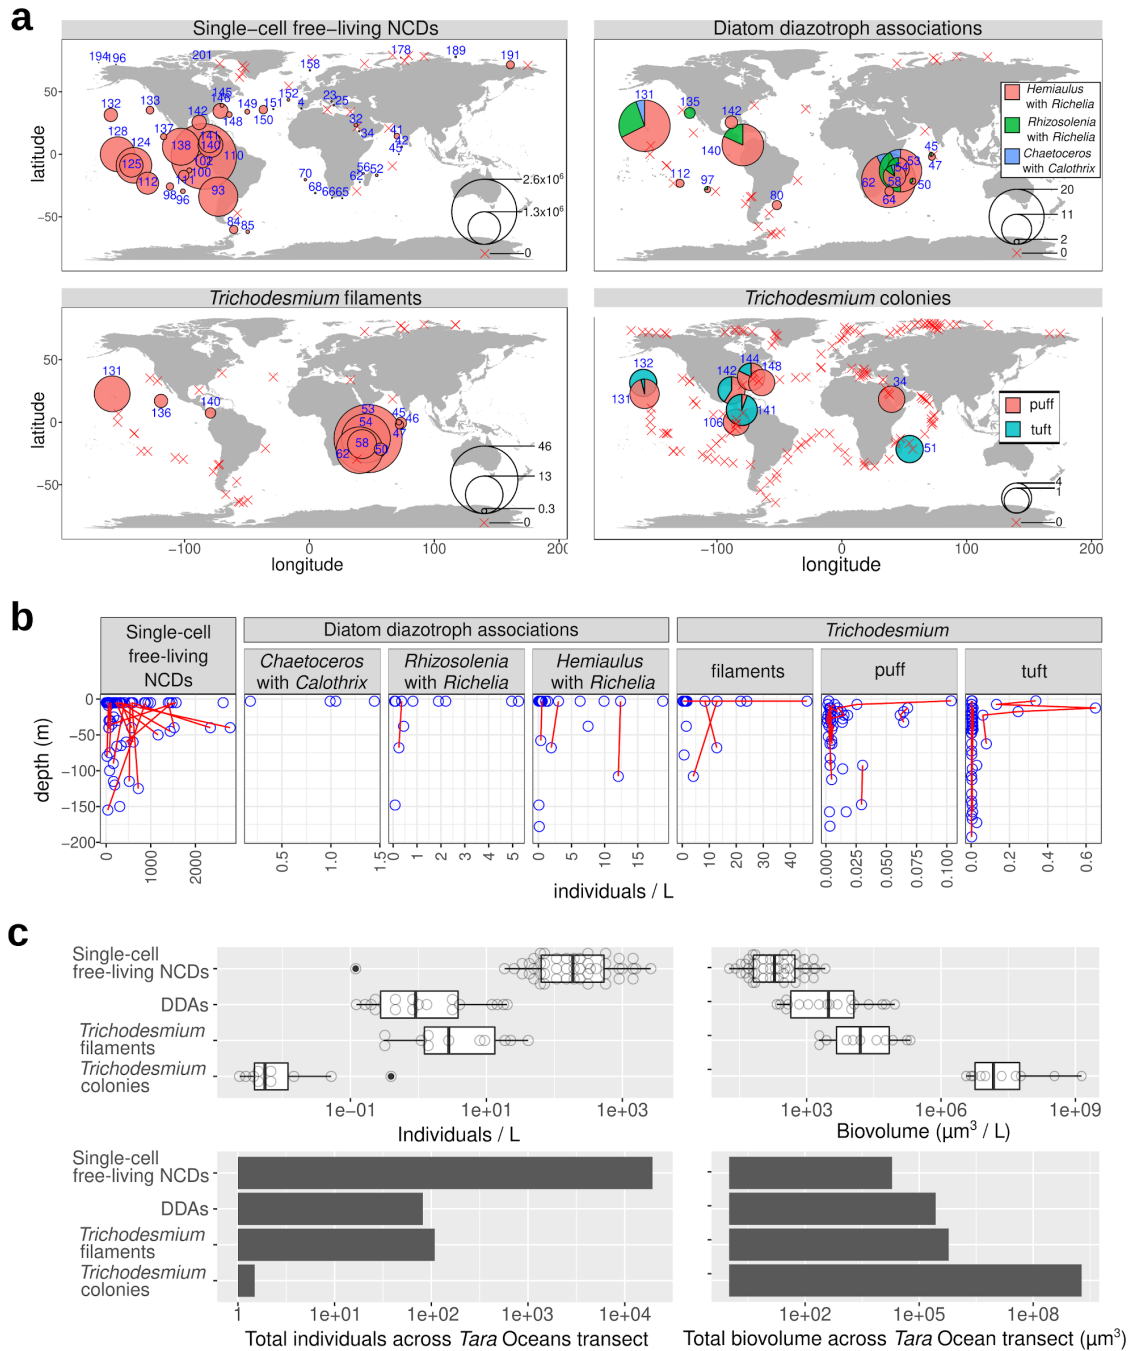

970  
 971 **Figure 2: Abundance and distribution of diazotrophs by quantitative imaging methods. (a)**  
 972 Biogeography in surface waters. Bubble size varies according to the corresponding diazotroph  
 973 concentration (individuals/L), while crosses indicate their absence. Station labels with detection of  
 974 diazotrophs are indicated in blue. **(b)** Depth partitioning. Samples from the same geographical site are  
 975 connected by lines. **(c)** Distribution of individual abundances and biomass in surface waters. Single-  
 976 cell free-living non-cyanobacterial diazotrophs (NCDs) were quantified by merging flow cytometry  
 977 counts with *nifH/recA* ratio from metagenomes from size fraction 0.22-1.6/3  $\mu\text{m}$  and assuming an  
 978 arbitrary average cellular biovolume of 1  $\mu\text{m}^3$ . The detection and biovolume determinations of diatom-  
 979 diazotroph associations (DDAs) and *Trichodesmium* free filaments were carried out by high-  
 980 throughput confocal microscopy in samples from the 20-180  $\mu\text{m}$  size fraction. In the case of  
 981 *Trichodesmium* colonies, it was determined using images from the UVP5 .



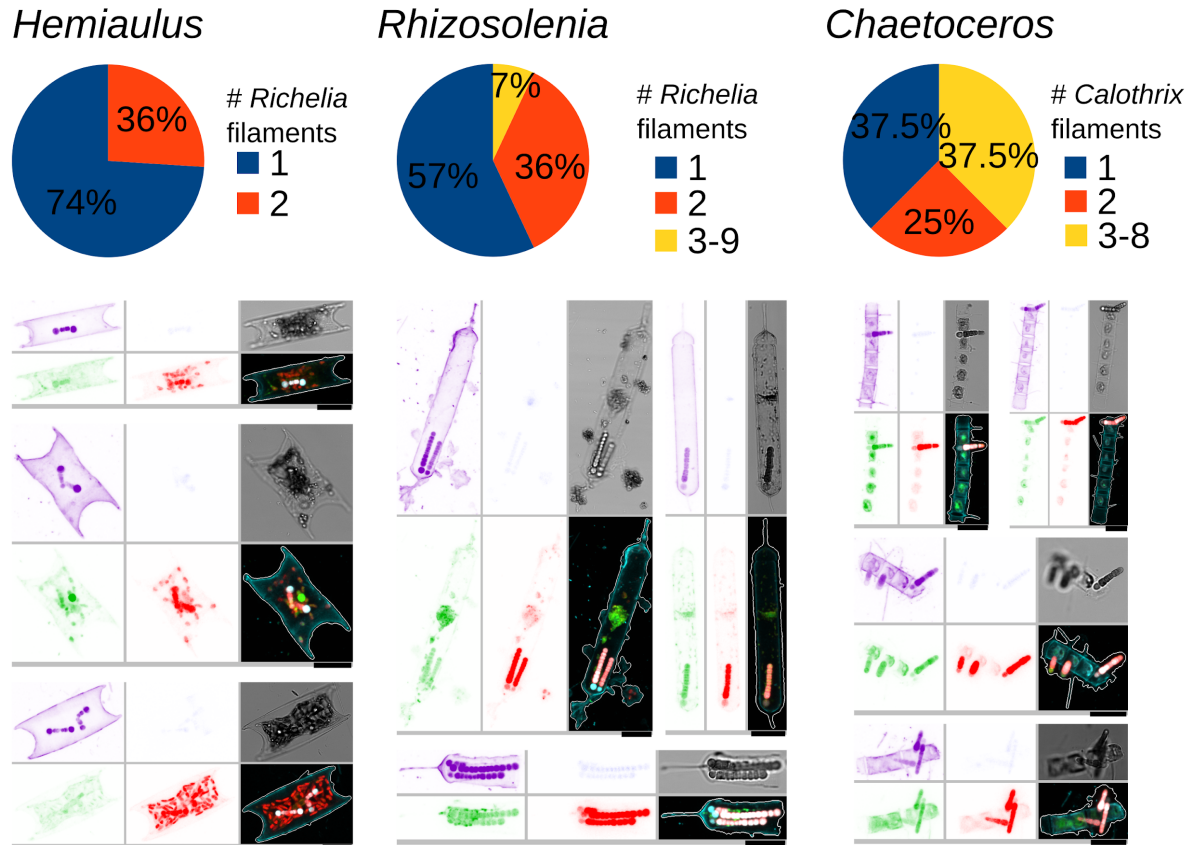

982  
983 **Figure 3:** Variation in the number of *Richelia/Calothrix* filaments among the diatom-diazotroph  
984 associations observed by high-throughput confocal microscopy. Examples of images are shown.  
985 From top left to bottom right, the displayed channels for each micrograph correspond to cell surface  
986 (cyan, AlexaFluor 546 dye), DNA (blue, Hoechst dye), cellular membranes (green, DiOC6 dye),  
987 chlorophyll autofluorescence (red), the bright field, and the merged channels. The size bar at the  
988 bottom left of each microscopy image corresponds to 10 µm.

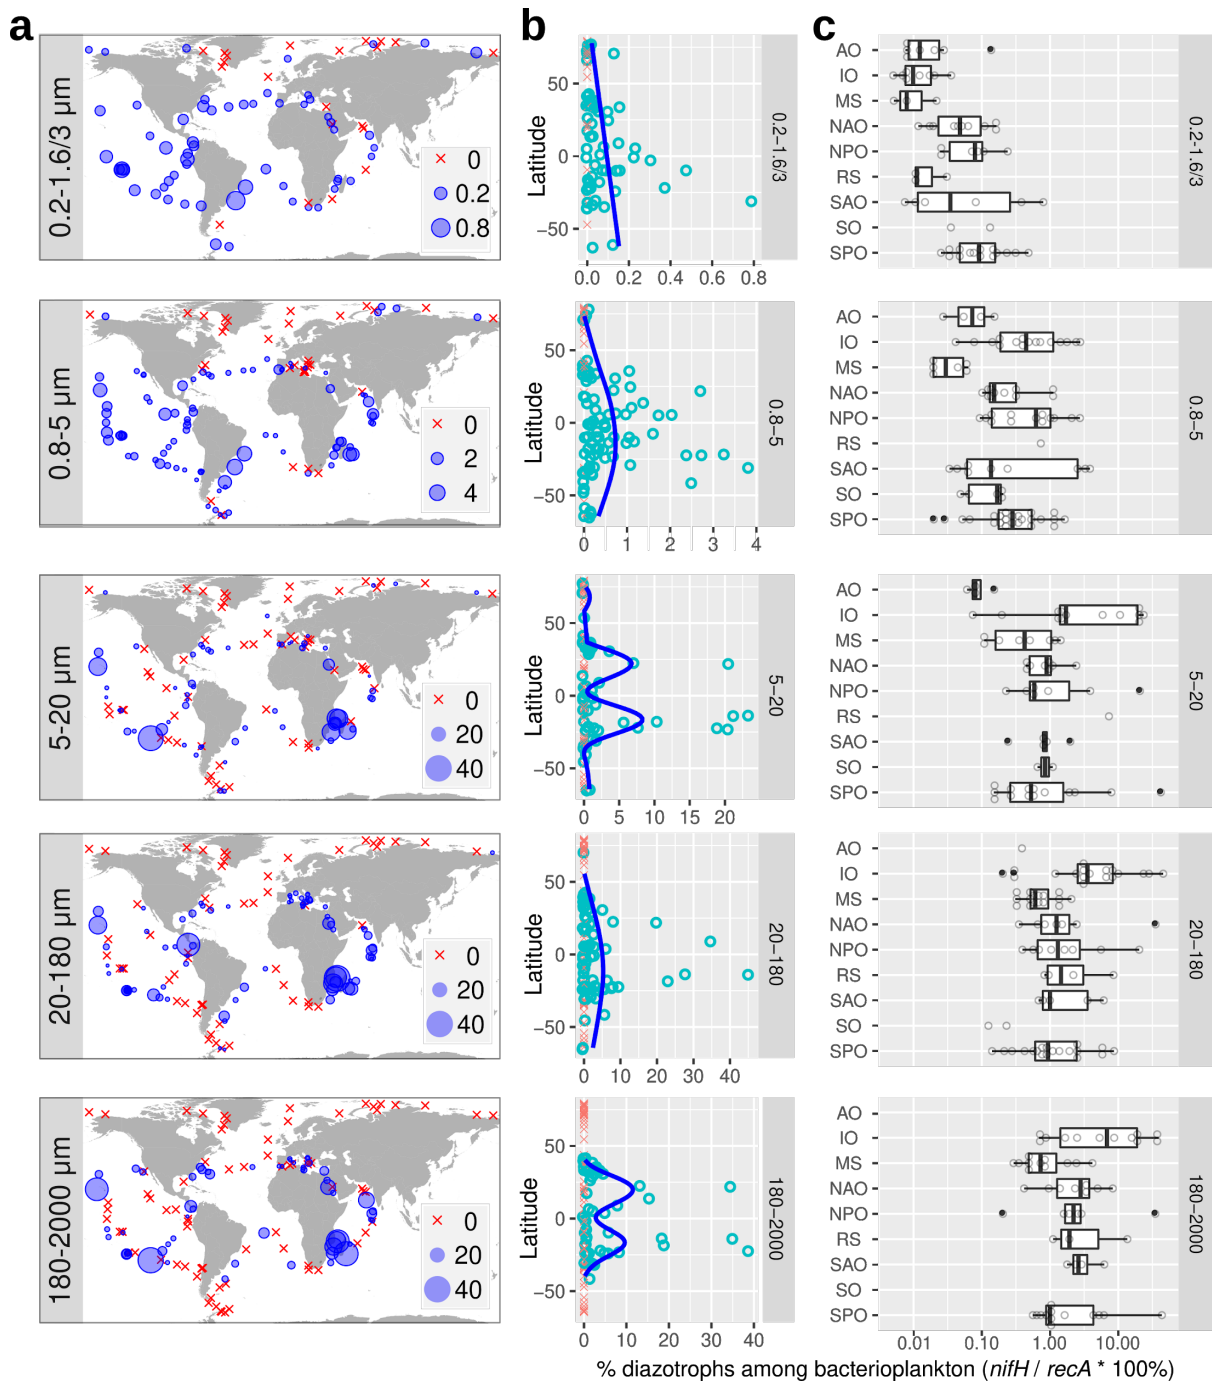

989  
 990 **Figure 4:** Biogeography of diazotrophs in surface waters using metagenomes obtained from different  
 991 size-fractionated samples. The percentage of diazotrophs in the bacterioplankton community was  
 992 estimated by the ratio of metagenomic read abundance between the marker genes *nifH* and *recA*. (a)  
 993 Biogeography. The bubble size varies according to the percentage of diazotrophs, while crosses  
 994 indicate absence (i.e., no detection of *nifH* reads). (b) Latitudinal abundance gradient. The blue lines  
 995 correspond to generalized additive model smoothings. (c) Ocean distribution. Abbreviations: MS,  
 996 Mediterranean Sea; IO, Indian Ocean; SAO, South Atlantic Ocean; SO, Southern Ocean; SPO, South  
 997 Pacific Ocean; NPO, North Pacific Ocean; NAO, North Atlantic Ocean; AO, Arctic Ocean.





91

1003

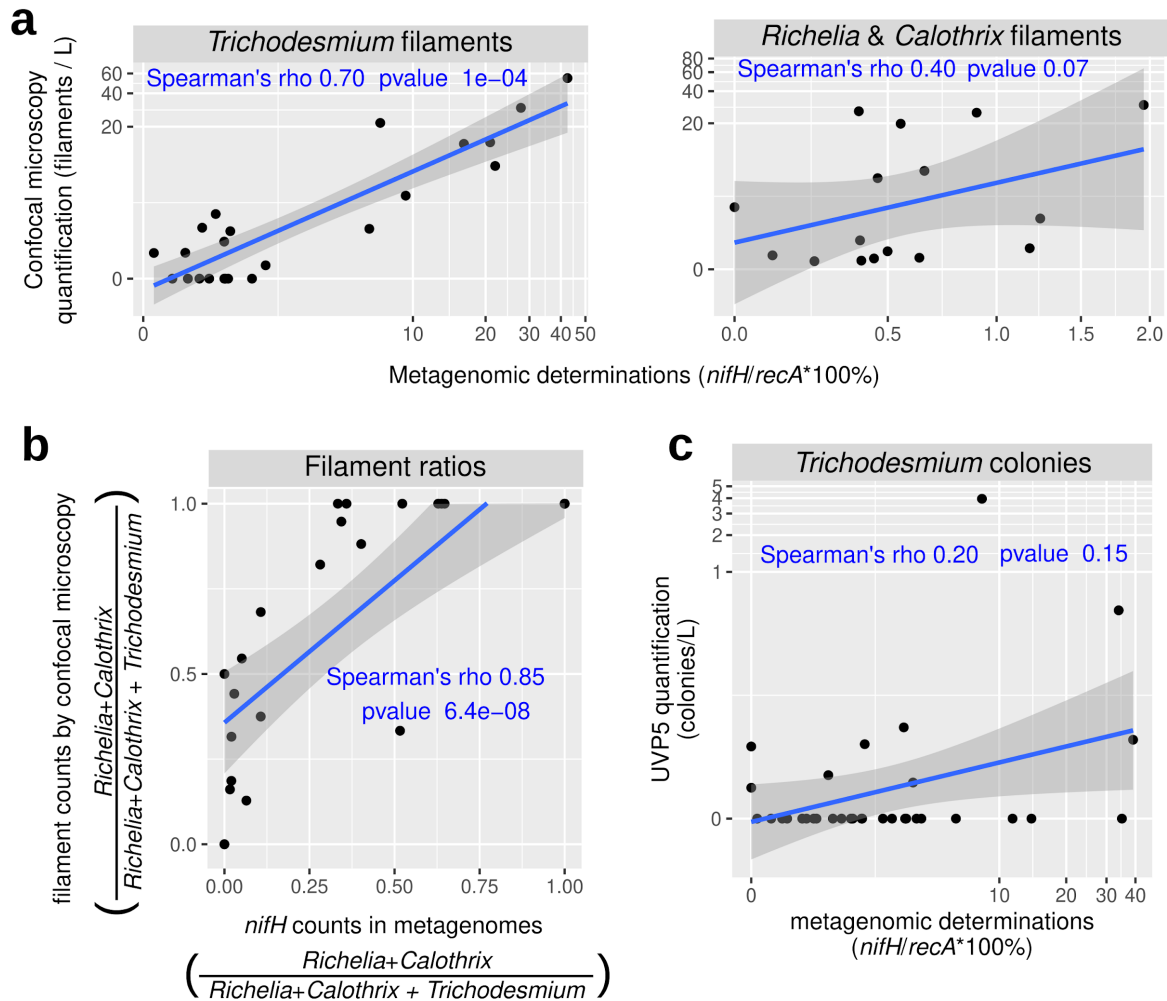

1004

1005

1006

1007

1008

1009

1010

1011

1012

1013

1014

**Figure 6:** Correlation analysis between diazotroph quantifications by imaging and molecular methods. **(a-b)** Comparison between high-throughput confocal microscopy and metagenomics. *Calothrix*, *Richelia* and *Trichodesmium* in samples from size fraction 20-180  $\mu\text{m}$  were measured by quantification of high-throughput confocal microscopy images (filaments  $\text{L}^{-1}$ ) and by metagenomic counts (% of diazotrophs in the bacterioplankton community by the ratio between the marker genes *nifH* and *recA*). **(a)** Correlation of relative abundances in metagenomes and absolute abundances by confocal microscopy for the three taxa. **(b)** Correlation between the ratio of abundances between taxa. **(c)** Comparison between UVP5 and metagenomics. *Trichodesmium* colonies were measured by UVP5 quantification (colonies  $\text{L}^{-1}$ ) and by metagenomic counts in the 180-2000  $\mu\text{m}$  size-fractionated samples. Spearman rho correlation coefficients and p-values are displayed in blue.

92

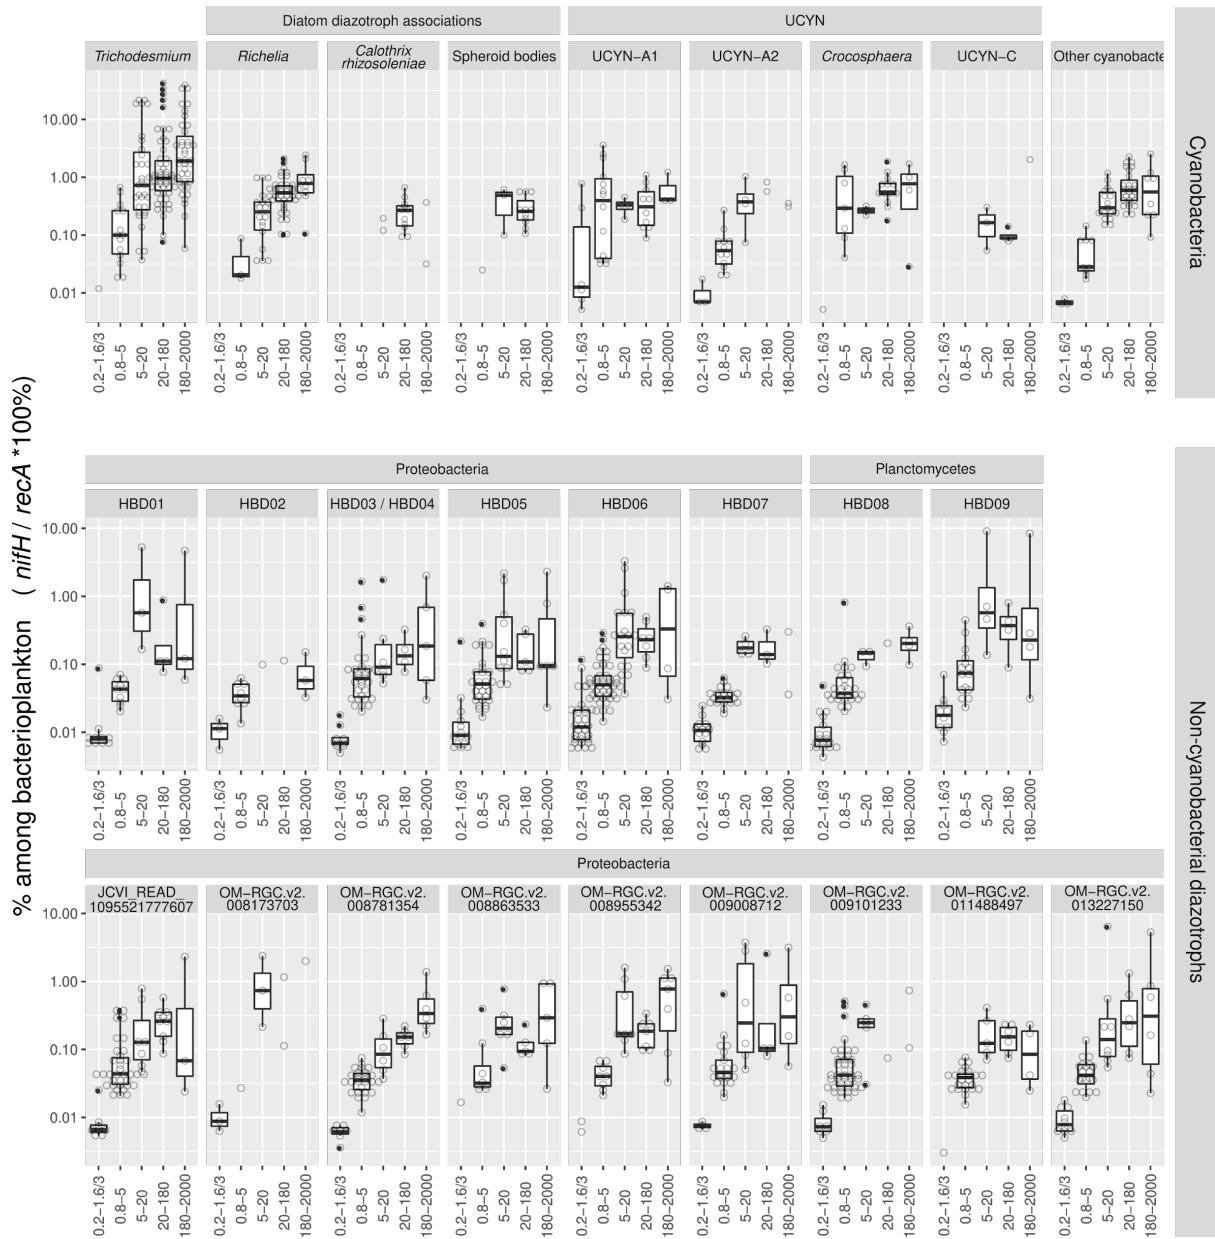

1015  
1016  
1017  
1018  
1019  
1020  
1021  
1022

**Figure 7:** Distribution of the main diazotroph taxa across metagenomes obtained in different size-fractionated samples from surface waters. For each taxon, the percentage in the bacterioplankton community is estimated by the ratio of metagenomic read abundance between the marker genes *nifH* and *recA*. The lineages grouped into 'Other cyanobacteria' are displayed in Supplementary Table S1. The 'OM-RGC.v2' prefix indicates the the *nifH* sequences assembled from the metagenomes of <3  $\mu\text{m}$  size fractions (Salazar et al., 2019), while HBD01 to HBD09 corresponds to the metagenome-assembled genomes from the same samples (Delmont et al 2018).

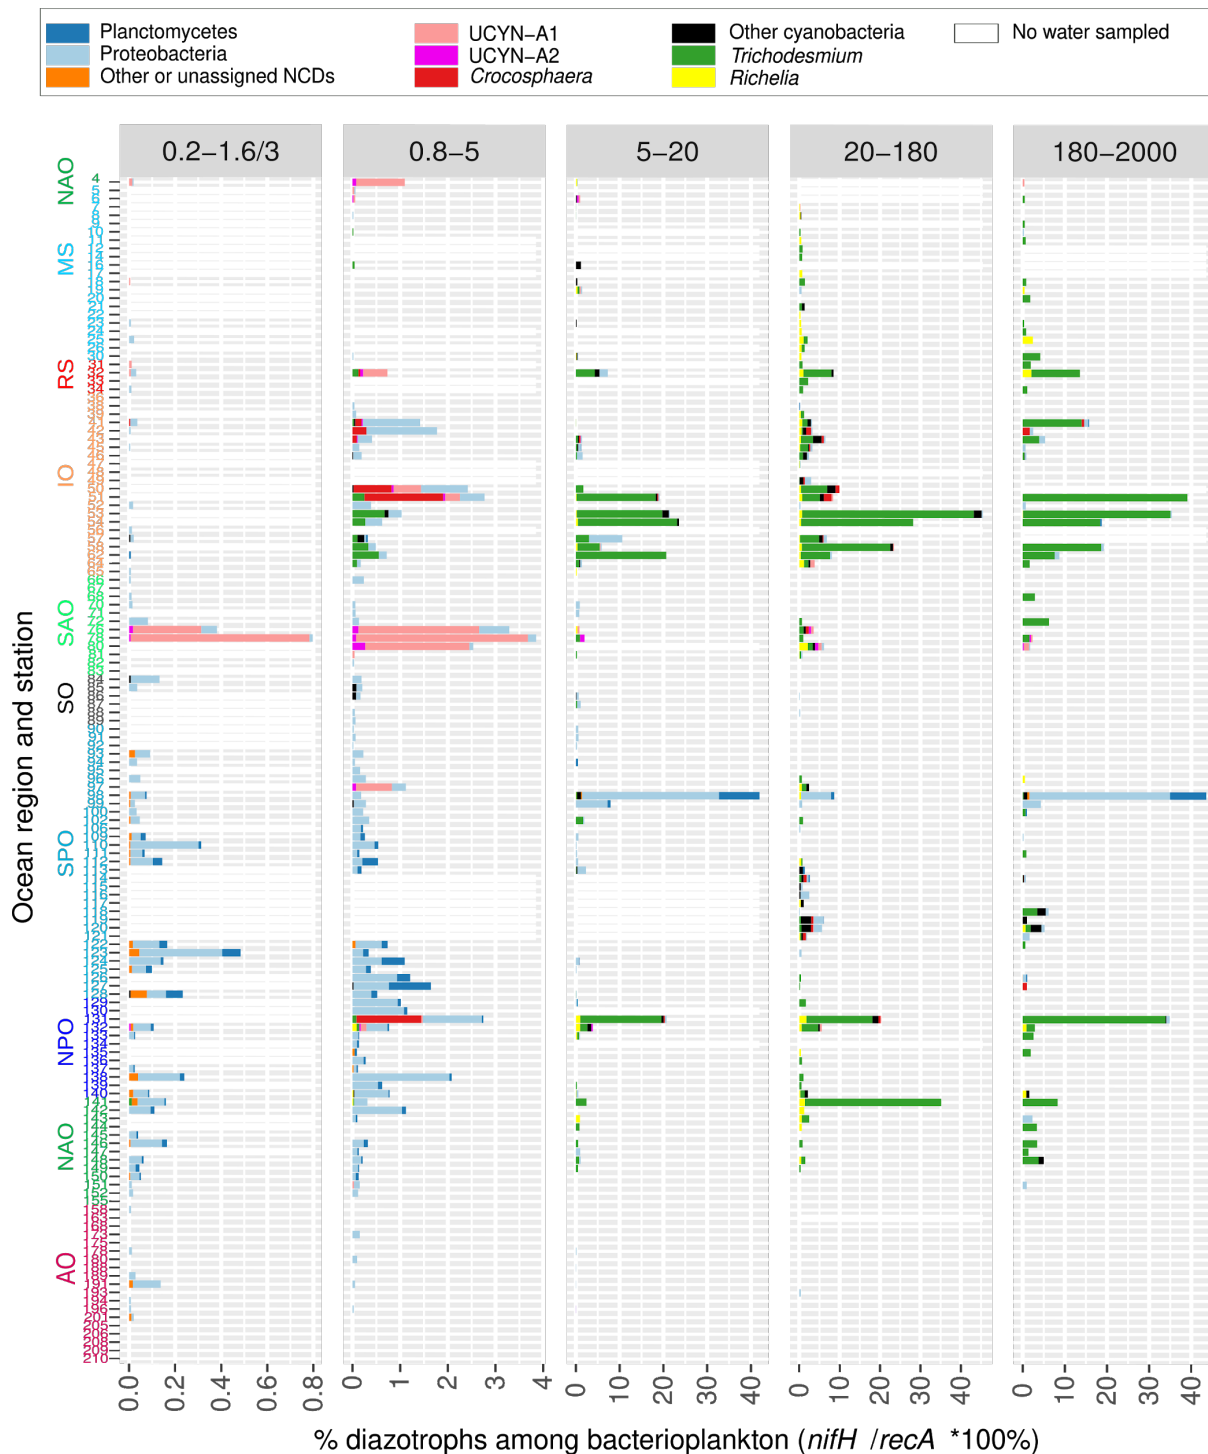

1023  
1024  
1025  
1026  
1027  
1028  
1029  
1030  
1031  
1032

**Figure 8:** Diazotroph community based on metagenomes from size-fractionated surface samples. The percentage of diazotrophs in the bacterioplankton community was estimated by the ratio of metagenomic read abundance between the marker genes *nifH* and *recA*. The bar color code shows the taxonomic annotation, while the absence of water sample is indicated by a white bar. The Y axis shows the *Tara* Oceans stations and the ocean regions. Abbreviations: MS, Mediterranean Sea; IO, Indian Ocean; SAO, South Atlantic Ocean; SO, Southern Ocean; SPO, South Pacific Ocean; NPO, North Pacific Ocean; NAO, North Atlantic Ocean; AO, Arctic Ocean. The equivalent figure showing the DCM water layer is shown in Figure S2 (note the differences in scales between both figures, showing the higher relative abundance of diazotrophs in the surface layer).

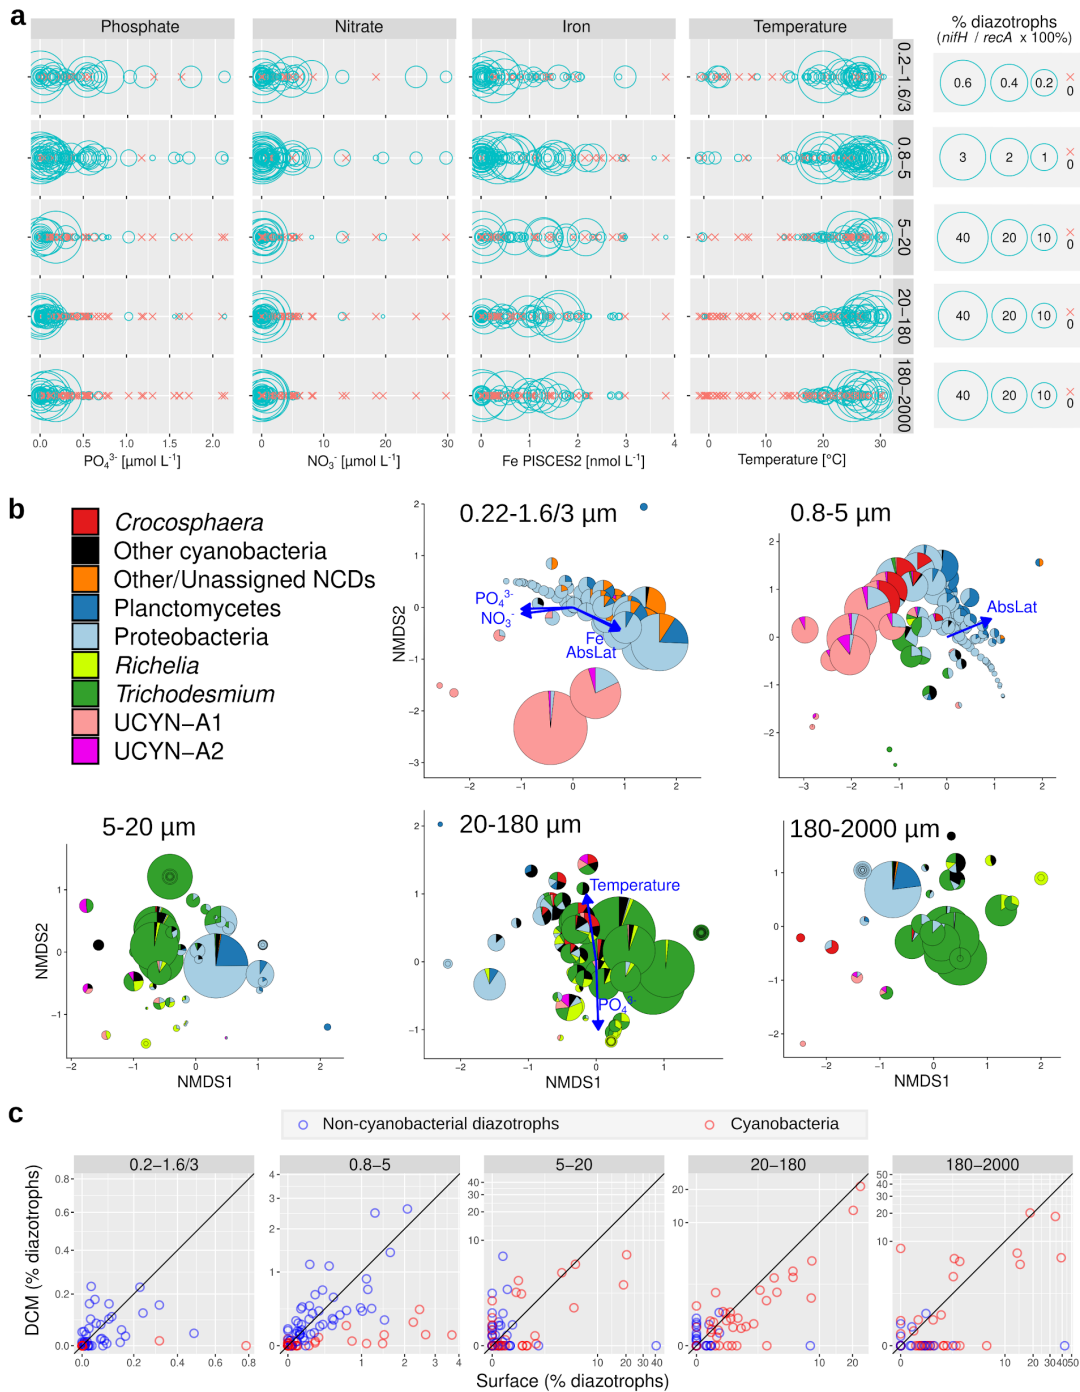

1033  
1034 **Figure 9:** Environmental parameters and diazotroph distributions. **(a)** Distribution across gradients of  
1035 nutrients and temperature in surface waters. Circles correspond to samples with diazotrophs, while  
1036 crosses indicate absence (i.e., no detection of *nifH* reads). **(b)** NMDS analysis of stations according to  
1037 Bray-Curtis distance between diazotroph communities of size-fractionated surface samples. Fitted  
1038 statistically significant physico-chemical parameters are displayed (adjusted *P* value < 0.05). NMDS  
1039 stress values: 0.07276045, 0.1122258, 0.1452893, 0.09693721, and 0.07969211. **(c)** Depth  
1040 distribution. The scatter plots compare the diazotroph abundances between surface (5 m) and deep  
1041 chlorophyll maximum (DCM; 17-180 m) for cyanobacteria (red points) and non-cyanobacterial  
1042 diazotrophs (NCDs, blue points). Axes are in the same scale and the diagonal line corresponds to a  
1043 1:1 slope.

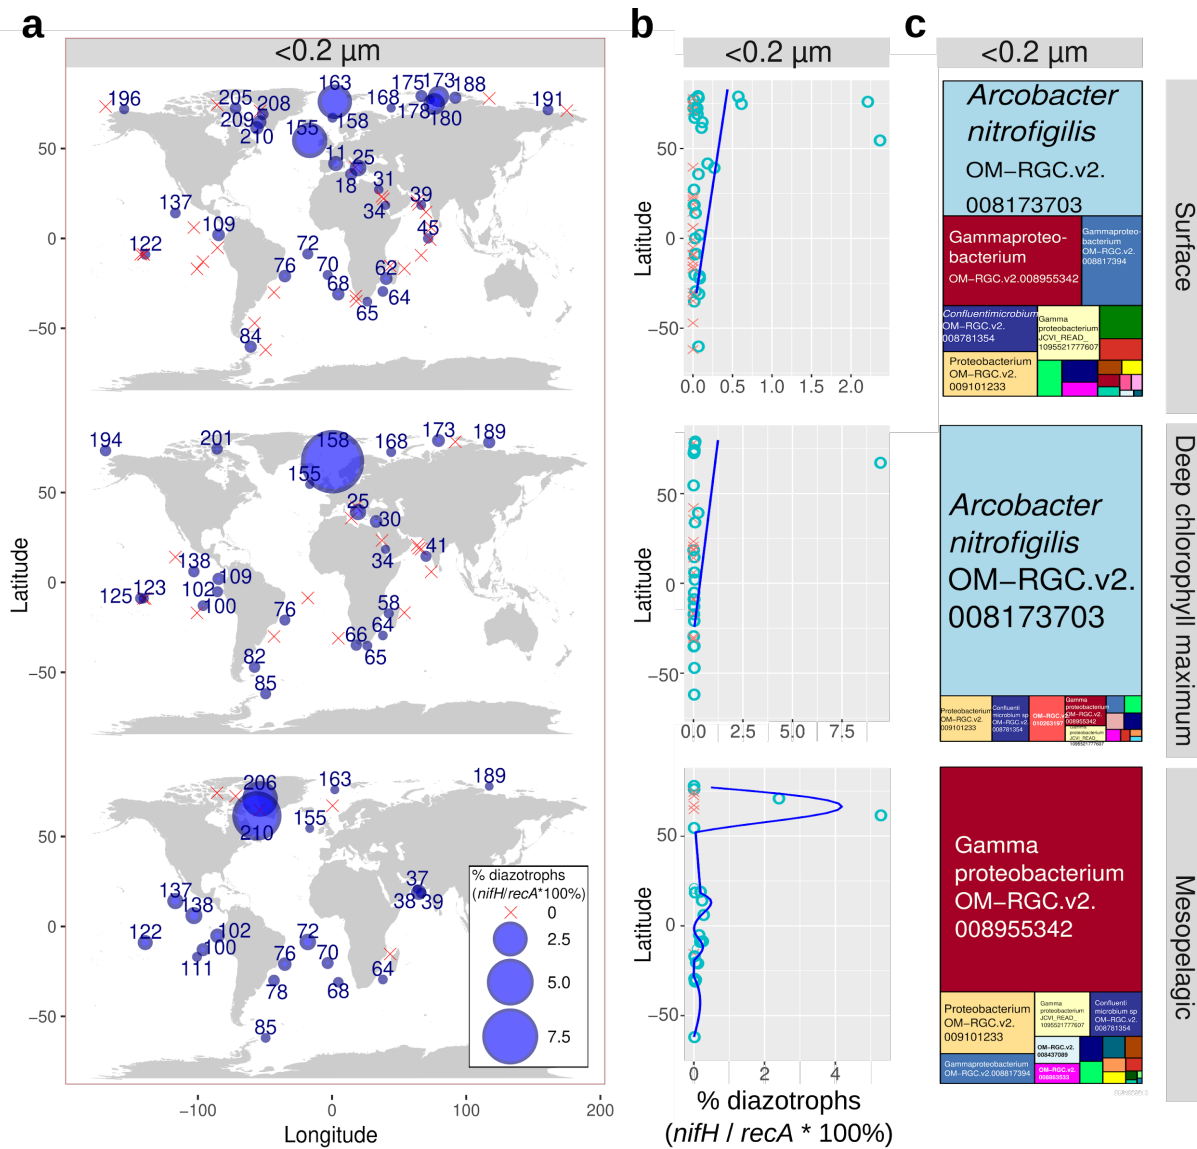

1044  
1045  
1046  
1047  
1048  
1049  
1050  
1051  
1052  
1053  
1054

**Figure 10:** Detection of ultrasmall diazotrophs in metagenomes obtained from  $<0.22 \mu$ m size-fractionated samples of different water layers. The percentage of diazotrophs among ultrasmall bacterioplankton was estimated by the ratio of metagenomic read abundance between the marker genes *nifH* and *recA*. **(a)** Biogeography. The bubble size varies according to the percentage of diazotrophs, while crosses indicate absence (i.e., no detection of *nifH* reads). Station labels with diazotrophs detection are indicated in blue. **(b)** Latitudinal abundance gradient. Circles correspond to samples with diazotrophs, while crosses indicate absence. The blue lines correspond to generalized additive model smoothings. **(c)** Taxonomic distribution. The 'OM-RGC.v2' prefix indicates the *nifH* sequences assembled from metagenomes of  $<3 \mu$ m size fractions (Salazar et al., 2019), including  $<0.22 \mu$ m.



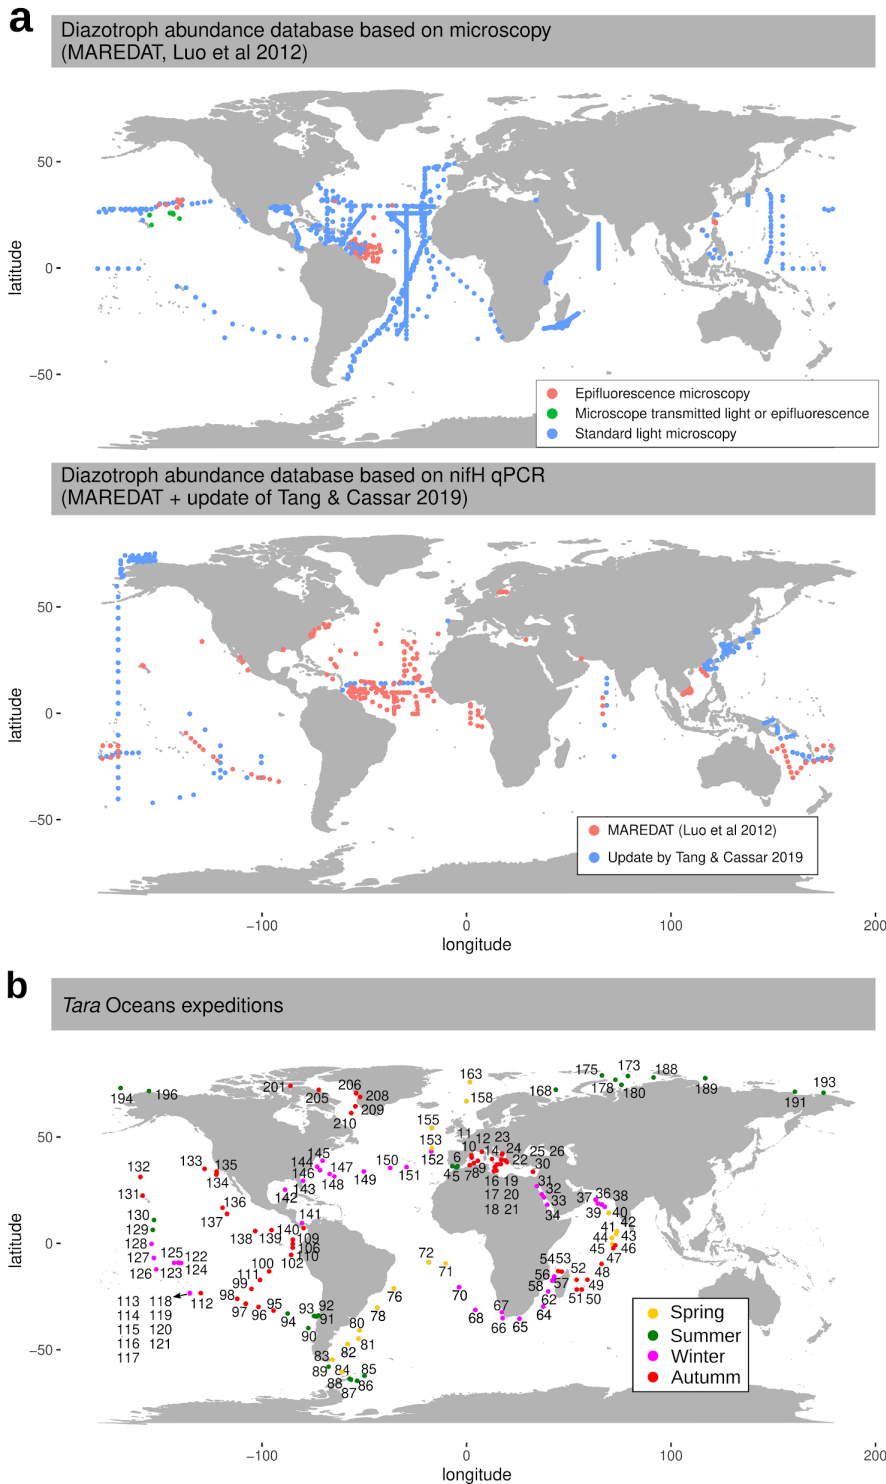

**Supplementary Figure S1:** Comparison between the databases of diazotroph distribution and the *Tara* Oceans expeditions. (a) The MARine Ecosystem DATA (MAREDAT) includes a database for microscopy counts (upper map) and for quantitative PCR targeting the *nifH* gene (lower map). The microscopy only covers *Trichodesmium* and diatom-diazotroph associations and it is a compilation of 44 different publications between 1966 and 2011 (Luo et al., 2012). The *nifH* dataset includes *Trichodesmium*, diatom-diazotroph associations, UCYN-A, *Crocosphaera* (UCYN-B) and UCYN-C and it is the result of 19 publications between 2005 and 2011 (red points; Luo et al., 2012). This later dataset has been recently updated by Tang and Cassar (2019) with measurements from 17 new publications between 2012 and 2018 (blue points). (b) Sampling route of the *Tara* Oceans expeditions (2009-2013), showing station labels and sampling season.

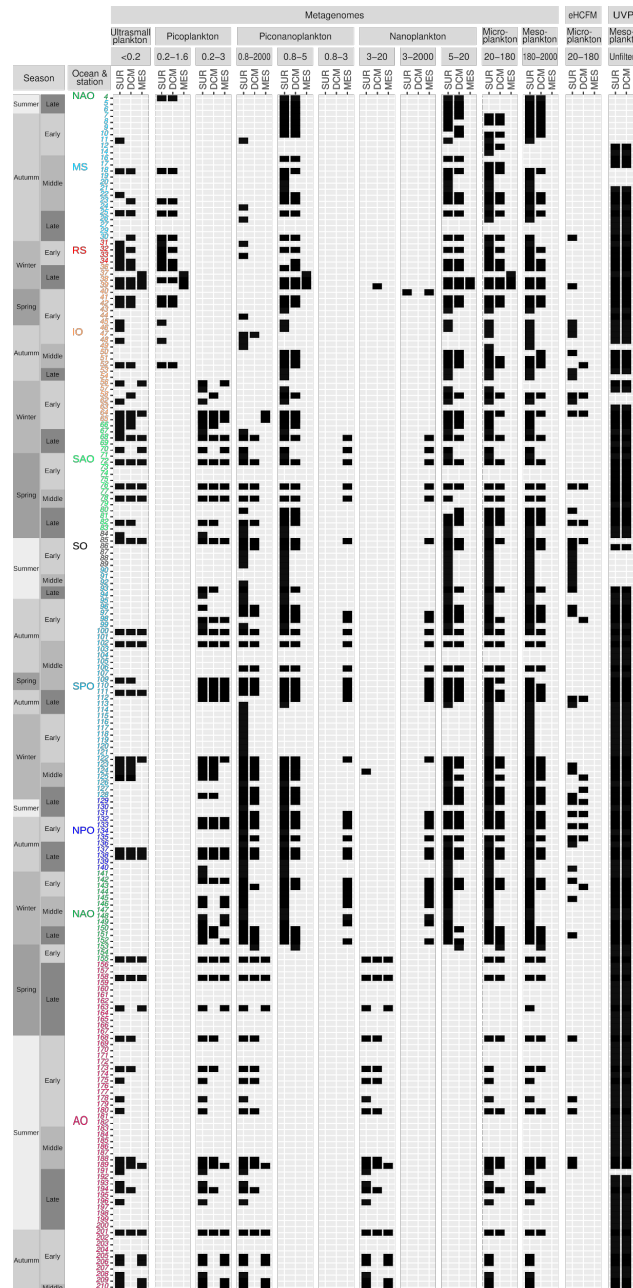

**Supplementary Figure S2:** Samples and methods used in this study. The current analysis of global diversity and abundance of diazotrophs was carried out across 197 *Tara* Oceans stations where samples were taken for metagenomic sequencing and/or for environmental High Content Fluorescence Microscopy (eHCFM) and/or images were taken *in situ* using an Underwater Vision Profiler 5 (UVP5). The analyzed samples are indicated as filled boxes. A complete sampling station consisted of collecting plankton from three distinct depth layers: surface (SUR), deep chlorophyll maximum (DCM), and mesopelagic (MES). The data from the bottom of the mixed layer was collected when no deep chlorophyll maximum was observed (stations TARA\_123, TARA\_124, TARA\_125, TARA\_152 and TARA\_153). Plankton communities from SUR and DCM were fractionated into six main size classes: ultrasmall plankton (<0.22  $\mu\text{m}$ ), picoplankton (0.2 to 1.6  $\mu\text{m}$  or 0.2 to 3  $\mu\text{m}$ ), piconanoplankton (0.8 to 5  $\mu\text{m}$  or 0.8 to 2000  $\mu\text{m}$ ), nanoplankton (5 to 20  $\mu\text{m}$  or 3 to 20  $\mu\text{m}$ ), microplankton (20 to 180  $\mu\text{m}$ ), and mesoplankton (180 to 2000  $\mu\text{m}$ ). For MES samples, size fractions were more heterogeneous (<0.22  $\mu\text{m}$ , 0.2 to 1.6  $\mu\text{m}$ , 0.2 to 3  $\mu\text{m}$ , 0.8 to 3  $\mu\text{m}$ , 0.8 to 5  $\mu\text{m}$ , 0.8 to 200  $\mu\text{m}$ , 0.8 to 2000  $\mu\text{m}$ , 3-20  $\mu\text{m}$ , 3-2000  $\mu\text{m}$ , 5-20  $\mu\text{m}$ ). Season and moment of the season (early, middle, late) are displayed to the left of the panel. Station labels are coloured according to the ocean region: IO, Indian Ocean; MS, Mediterranean Sea; NAO, North Atlantic Ocean; RS, Red Sea; SAO, South Atlantic Ocean; SO, Southern Ocean; SPO, South Pacific Ocean.



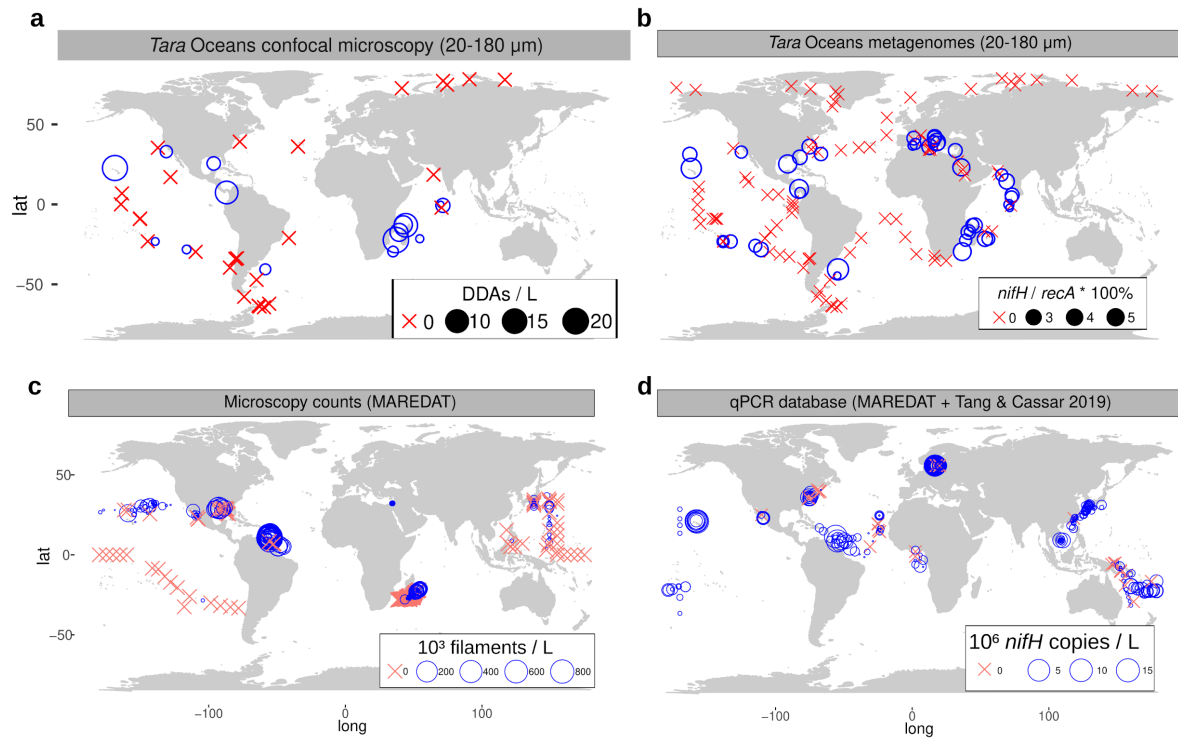

**Supplementary Figure S3:** Biogeography of diatom-diazotroph associations (DDAs) in surface waters. **(a-b)** Abundance across the *Tara* Oceans transect based on quantification of high-throughput confocal microscopy determinations (a) and from metagenomic read abundance of *nifH* gene (b). **(c-d)** Abundance in the MARine Ecosystem DATa (MAREDAT) database for microscopy counts (c) and for quantitative PCR targeting the *nifH* gene (d). This latter includes the recent compilation update by Tang and Cassar 2019. Bubble size varies according to the corresponding concentration, while crosses indicate their absence.

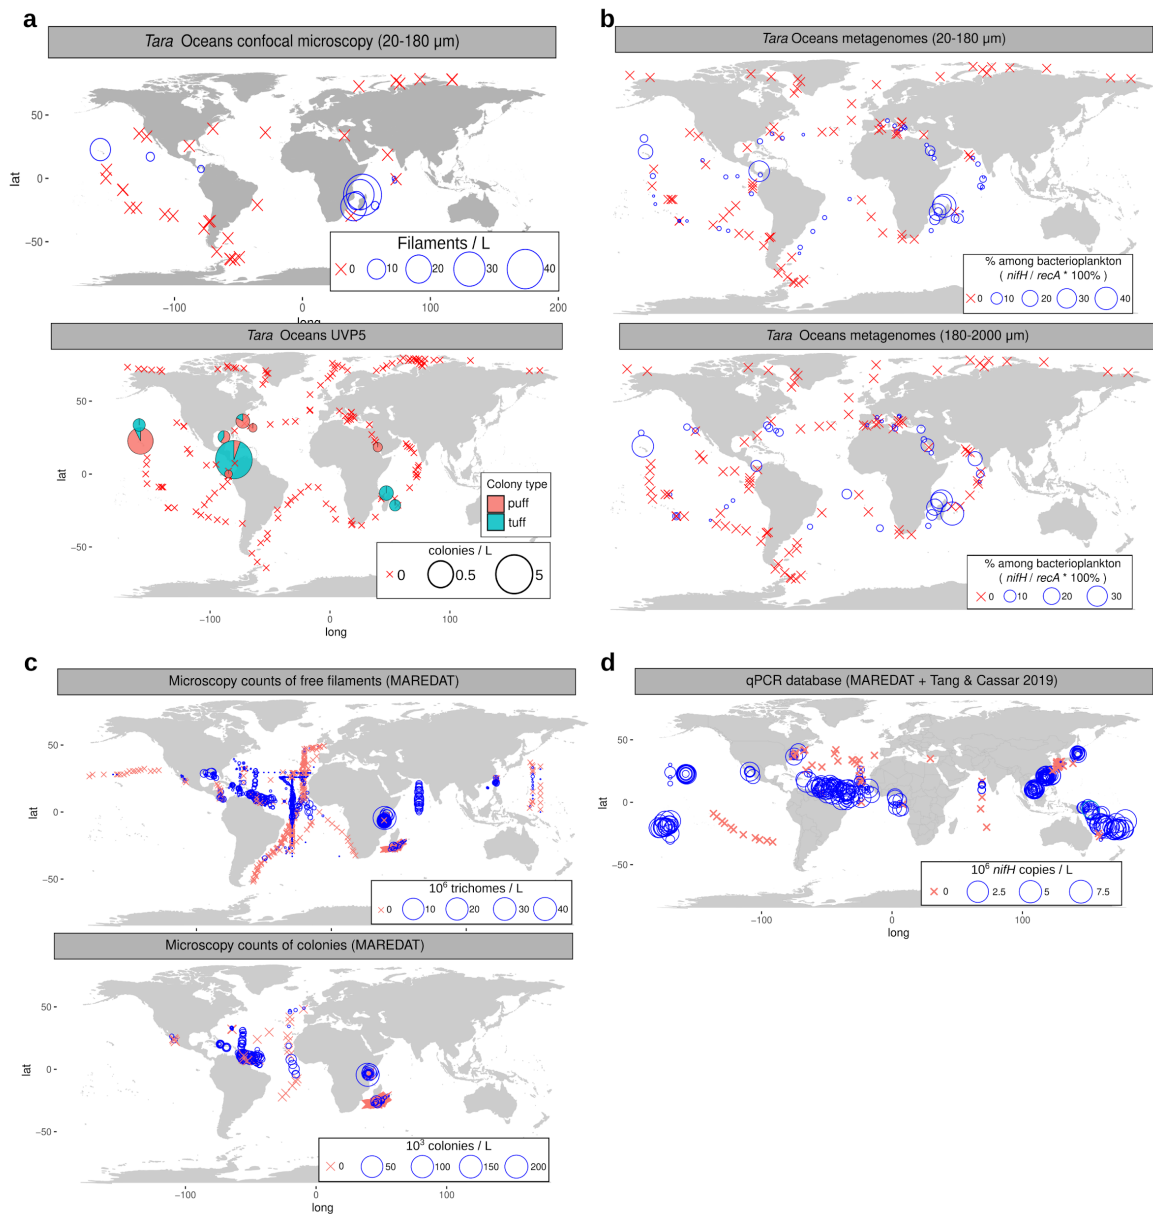

**Supplementary Figure S4:** Biogeography of *Trichodesmium* aggregates in surface waters. **(a)** Abundance across the *Tara Oceans* transect of free-filaments by high-throughput confocal microscopy in 20-180- $\mu\text{m}$  size-fractionated samples (upper map) and colonies by Underwater Vision Profiler 5 (lower map). **(b)** Abundance across the *Tara Oceans* transect based on the metagenomic read abundance of the *nifH* marked gene in 20-180- $\mu\text{m}$  and 180-2000- $\mu\text{m}$  size-fractionated samples. **(c-d)** Abundance in the MARine Ecosystem DATA (MAREDAT) database for microscopy counts of free-filaments (c; upper map) and colonies (c; lower map) and for quantitative PCR targeting the *nifH* gene (d). This latter includes the recent compilation update by Tang and Cassar 2019. Bubble size varies according to the corresponding concentration, while crosses indicate their absence.

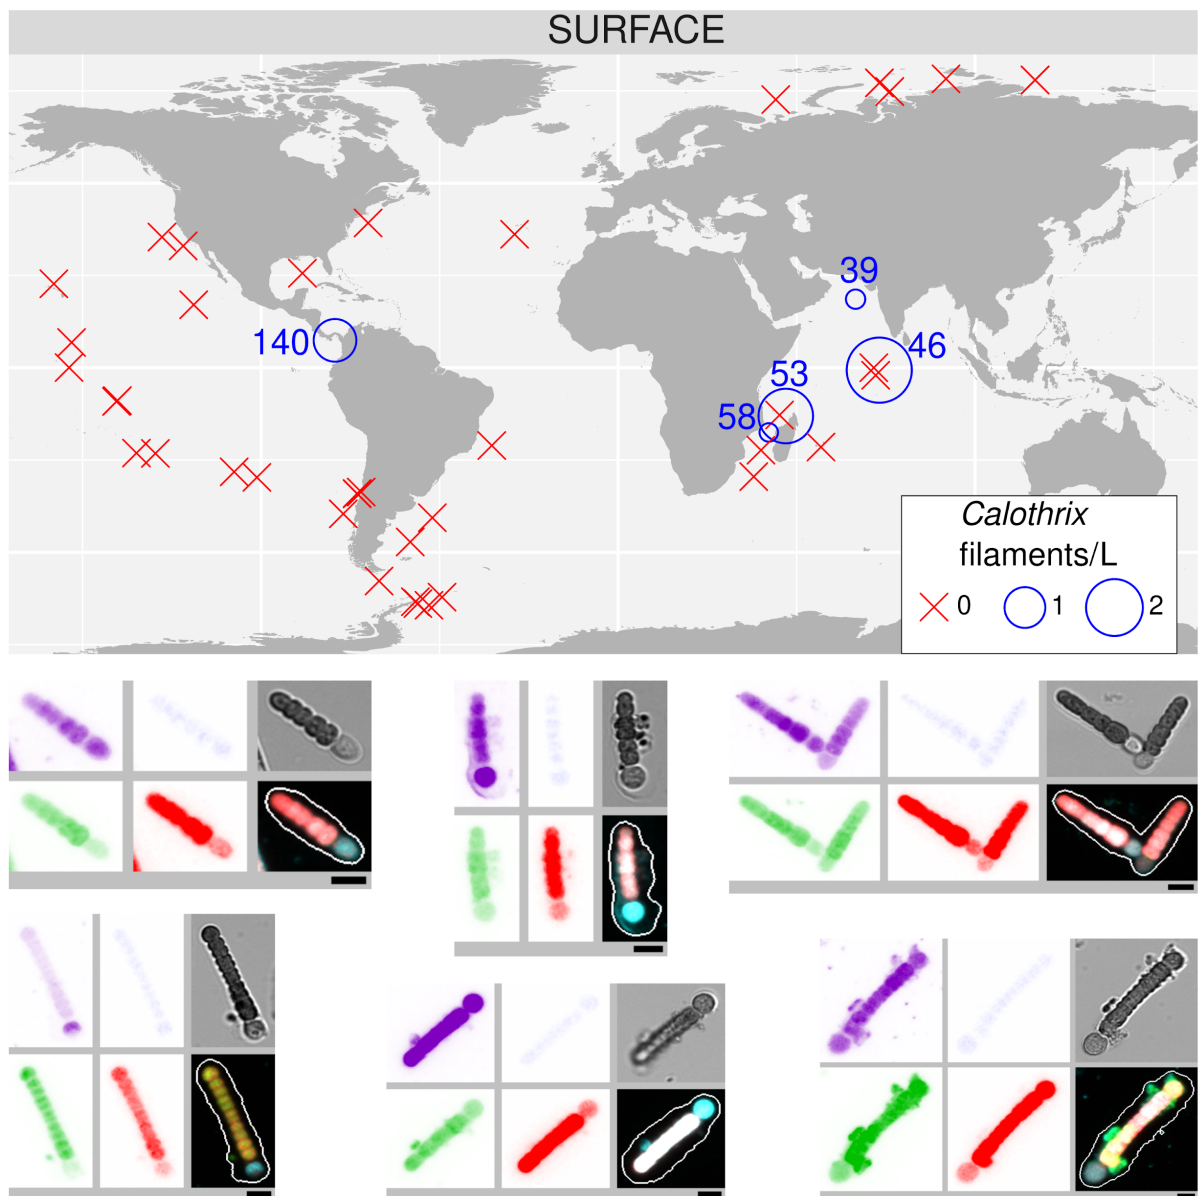

**Supplementary Figure S5:** Abundance and distribution of free filaments of *Richelia/Calothrix* in surface waters by quantification of high-throughput confocal microscopy images in samples from size fraction 20-180  $\mu\text{m}$ . Maps show the biogeographical distribution. Bubble size varies according to the corresponding filament concentration, while red crosses indicate their absence. Examples of images are shown. From up left to bottom right, the displayed channels for each micrograph correspond to cell surface (cyan, AlexaFluor 546 dye), DNA (blue, Hoechst dye), cellular membranes (green, DiOC6 dye), chlorophyll autofluorescence (red), the bright field, and the merged channels. The size bar at the bottom left of each microscopy image corresponds to 2.5  $\mu\text{m}$ .

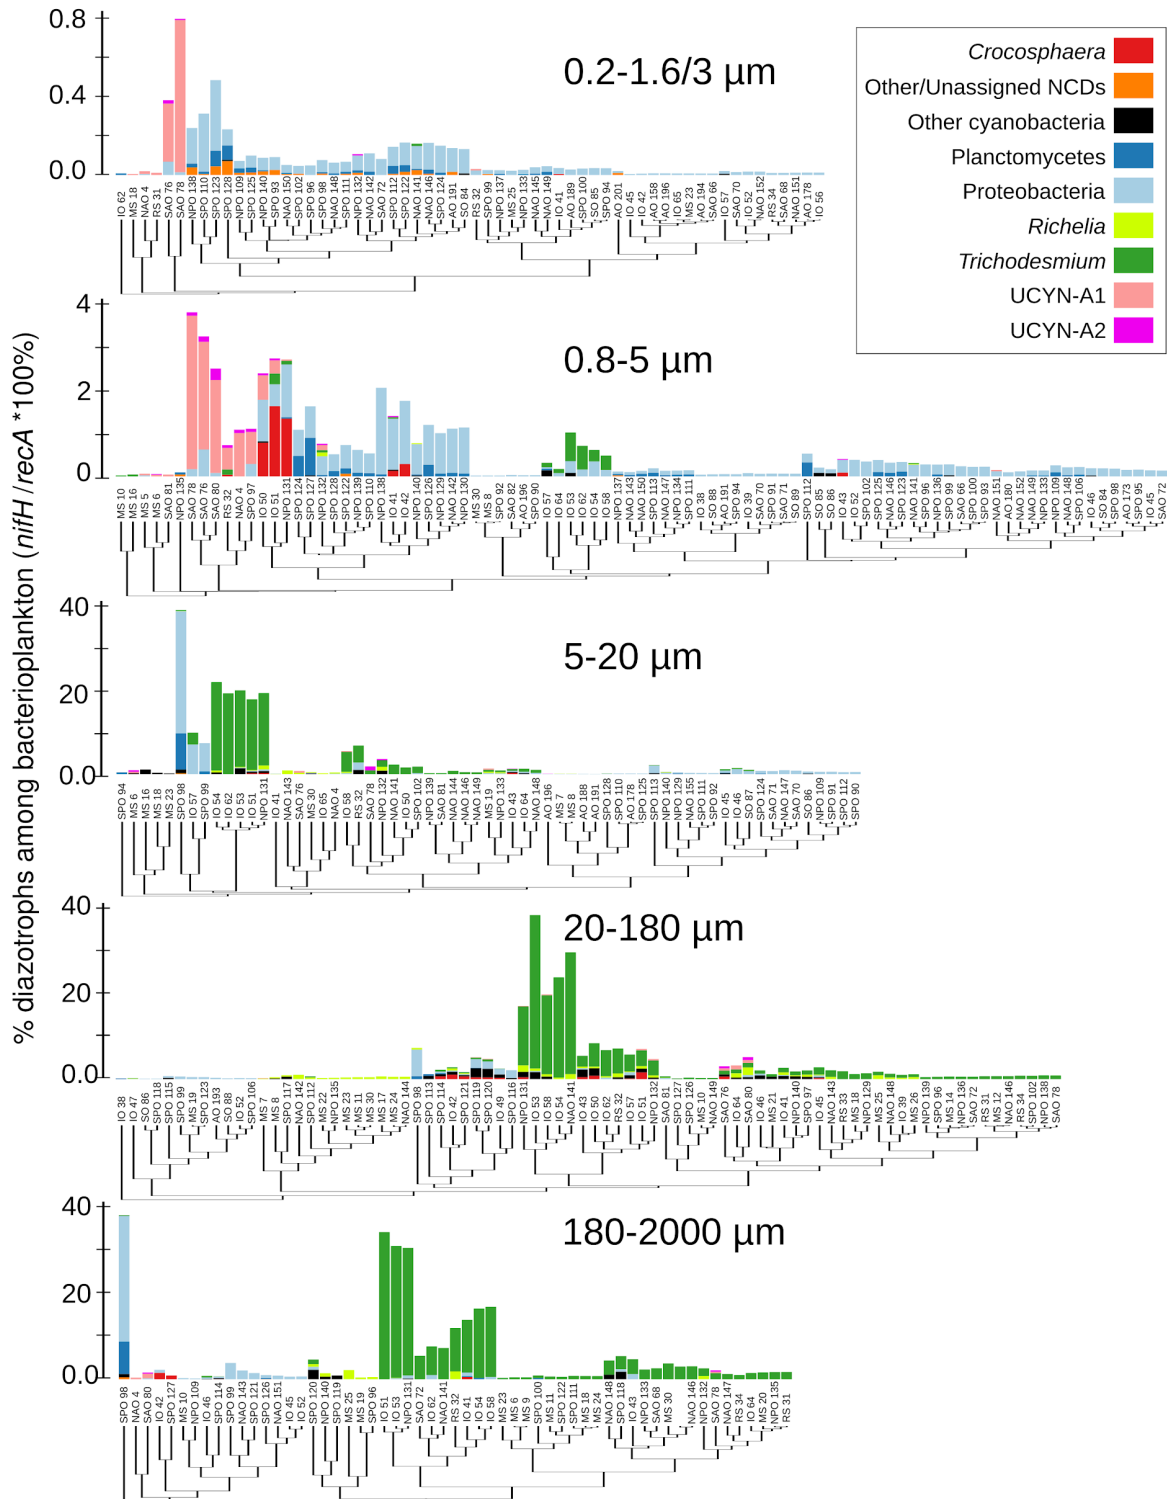

**Supplementary Figure S6:** Clusters of diazotroph communities based on metagenomes from size-fractionated surface samples. For each size fraction, the samples are sorted by similarity using hierarchical clustering (Bray–Curtis distance) and the corresponding diazotroph relative abundances are displayed as bar plots, with the color code according to the taxonomic annotation. The percentage of diazotrophs in the bacterioplankton community was estimated by the ratio of metagenomic read abundance between the marker genes *nifH* and *recA*. The dendrogram tip labels show the *Tara* Oceans stations and the ocean regions. Abbreviations: MS, Mediterranean Sea; IO, Indian Ocean; SAO, South Atlantic Ocean; SO, Southern Ocean; SPO, South Pacific Ocean; NPO, North Pacific Ocean; NAO, North Atlantic Ocean; AO, Arctic Ocean.

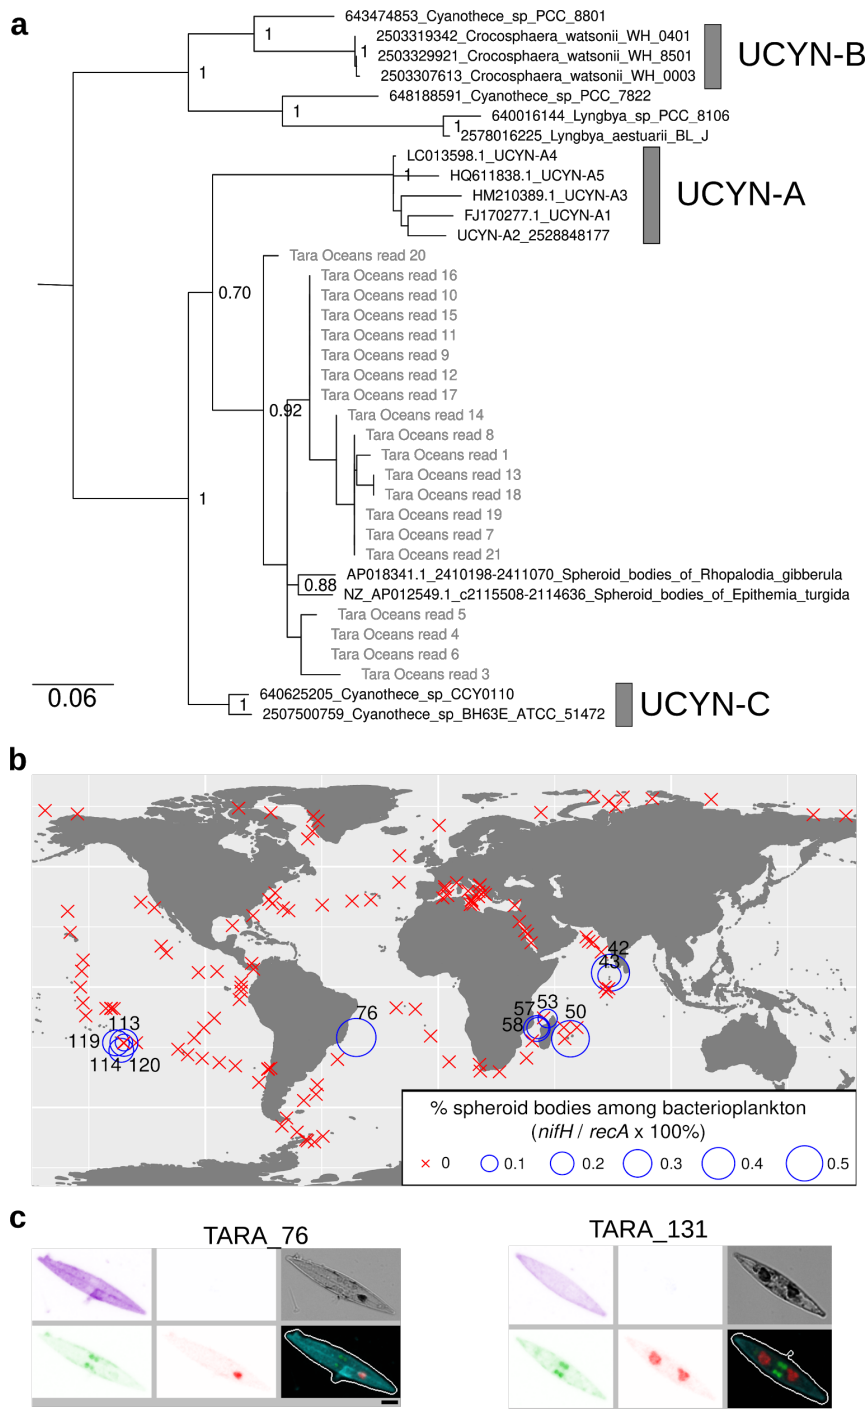

**Supplementary Figure S7:** Putative spheroid bodies in *Tara Oceans* samples. **(a)** Phylogeny of metagenomic reads with sequence similarity to the *nifH* gene from spheroid bodies. NCBI or IMG accession numbers of reference nucleotide sequences and the species names are indicated in the tip labels. The aLRT values are shown for the main clades. **(b)** Biogeography in surface waters of 20-180  $\mu\text{m}$  size fractionated samples. The bubble size varies according to the percentage of reads of potential spheroid bodies, while crosses indicate absence (i.e., no detection of *nifH* reads). Station labels with read detection are indicated. **(c)** Images of pennate diatoms containing round granules that lack chlorophyll autofluorescence that were observed in the same samples where putative metagenomic sequences from spheroid-bodies were detected. From up left to bottom right, the displayed channels for each micrograph correspond to cell surface (cyan, AlexaFluor 546 dye), DNA (blue, Hoechst dye), cellular membranes (green, DiOC6 dye), chlorophyll autofluorescence (red), the bright field, and the merged channels. The size bar at the bottom left of each microscopy image corresponds to 2.5  $\mu\text{m}$ .

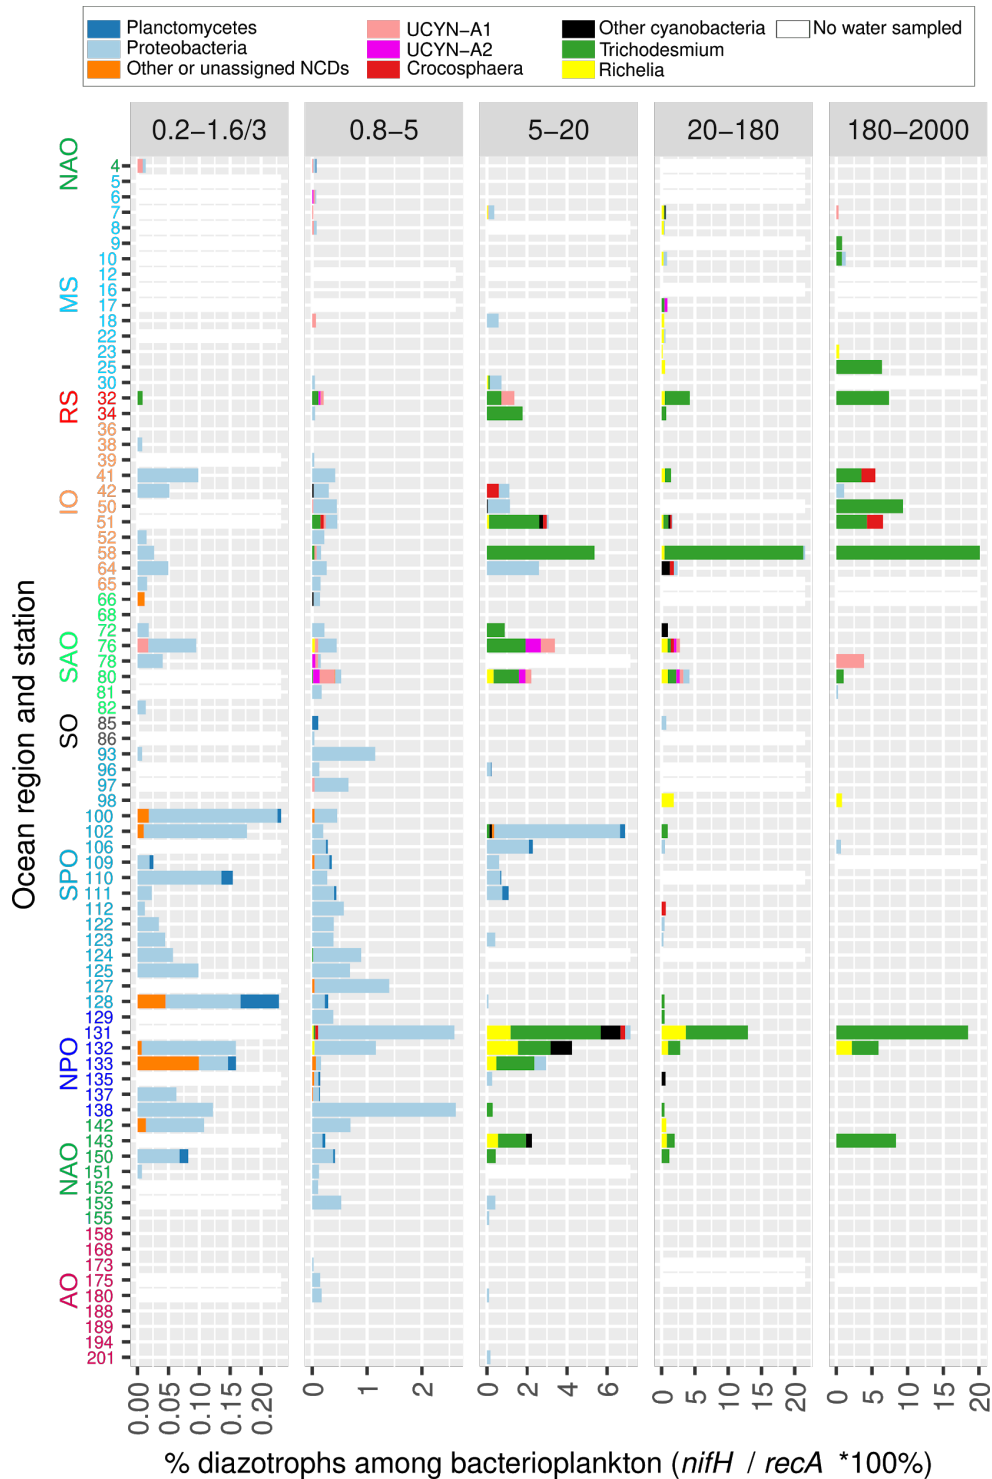

**Supplementary Figure S8:** Diazotroph community based on metagenomes from size-fractionated samples derived from deep-chlorophyll maxima. The percentage of diazotrophs in the bacterioplankton community was estimated by the ratio of metagenomic read abundance between the marker genes *nifH* and *recA*. The bar color code shows the taxonomic annotation, and the absence of water sample is indicated by a white bar. The Y axis shows the *Tara* Oceans stations and the ocean regions. Abbreviations: MS, Mediterranean Sea; IO, Indian Ocean; SAO, South Atlantic Ocean; SO, Southern Ocean; SPO, South Pacific Ocean; NPO, North Pacific Ocean; NAO, North Atlantic Ocean; AO, Arctic Ocean. The equivalent figure showing the surface layer is shown in Figure 7 (note the differences in scales between both figures, showing the higher relative abundance of diazotrophs in the surface layer). The data from the bottom of the mixed layer is displayed when no deep chlorophyll maximum was observed (stations TARA\_123, TARA\_124, TARA\_125, TARA\_152 and TARA\_153).



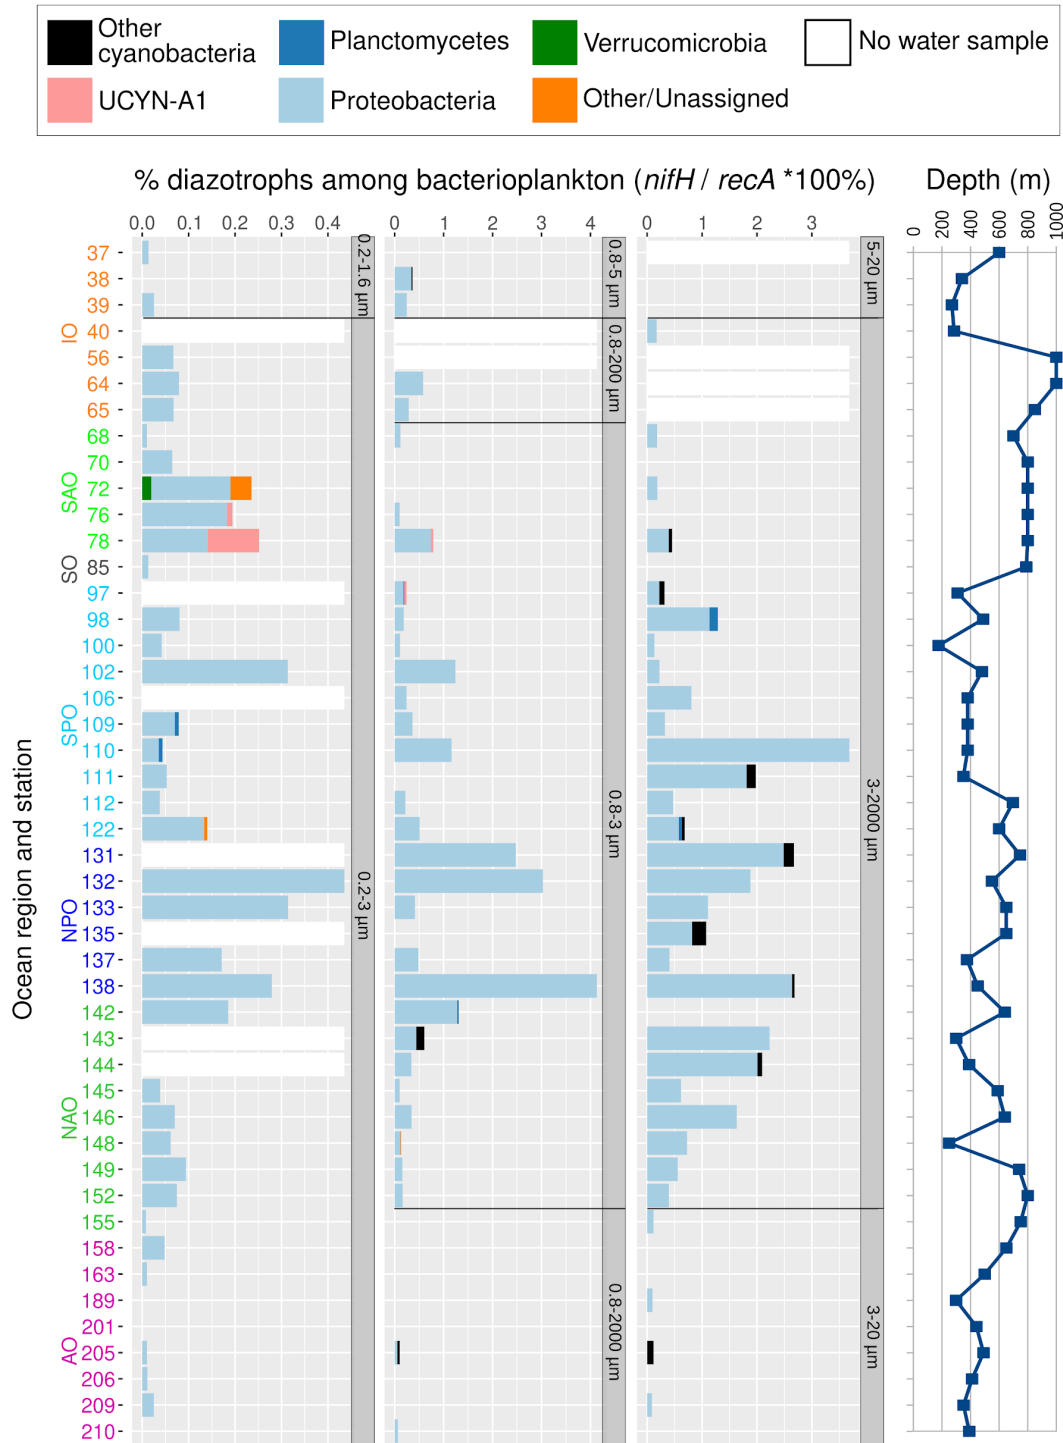

**Supplementary Figure S9:** Diazotroph community based on metagenomes from size-fractionated samples from mesopelagic depths. The percentage of diazotrophs in the bacterioplankton community was estimated by the ratio of metagenomic read abundance between the marker genes *nifH* and *recA*. The bar color code shows the taxonomic annotation, and the absence of water sample is indicated by a white bar. Size fractions are also indicated (they are more heterogeneous than those from surface and deep chlorophyll maximum samples). The Y axis shows the *Tara* Oceans stations and the ocean regions. Abbreviations: MS, Mediterranean Sea; IO, Indian Ocean; SAO, South Atlantic Ocean; SO, Southern Ocean; SPO, South Pacific Ocean; NPO, North Pacific Ocean; NAO, North Atlantic Ocean; AO, Arctic Ocean. Sampling depth is indicated in the right panel.

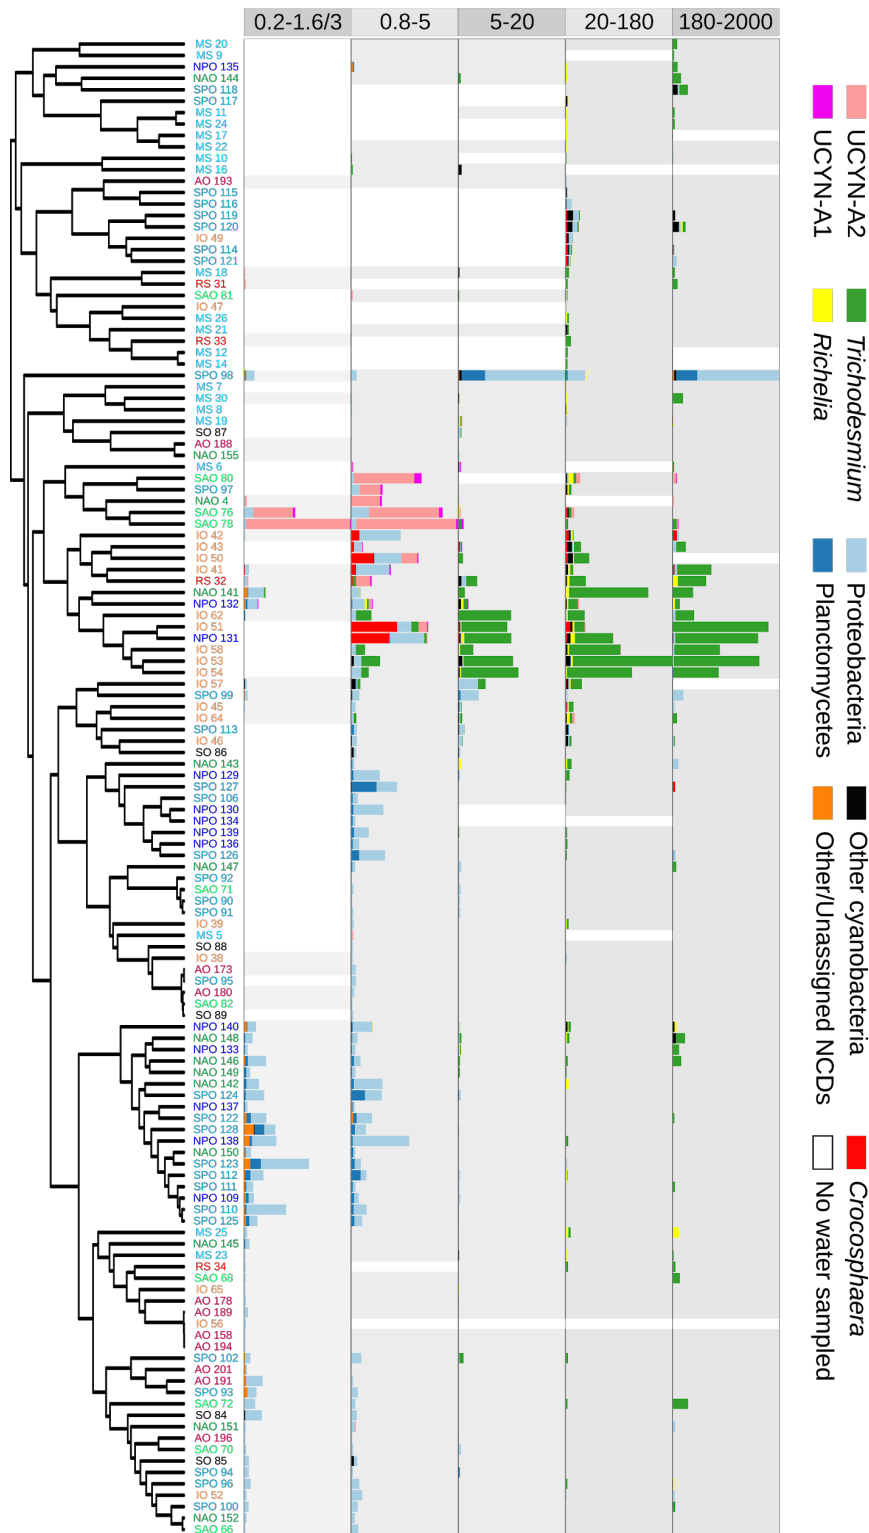

**Supplementary Figure S10:** Clusters of diazotroph communities based on metagenomes from size-fractionated surface samples. For each size fraction, the samples are sorted by similarity using hierarchical clustering (Bray–Curtis distance) and the corresponding diazotroph relative abundances are displayed as bar plots, with the color code according to the taxonomic annotation. The percentage of diazotrophs in the bacterioplankton community was estimated by the ratio of metagenomic read abundance between the marker genes *nifH* and *recA*. The dendrogram tip labels show the Tara Oceans stations and the ocean regions. Abbreviations: MS, Mediterranean Sea; IO, Indian Ocean; SAO, South Atlantic Ocean; SO, Southern Ocean; SPO, South Pacific Ocean; NPO, North Pacific Ocean; NAO, North Atlantic Ocean; AO, Arctic Ocean.



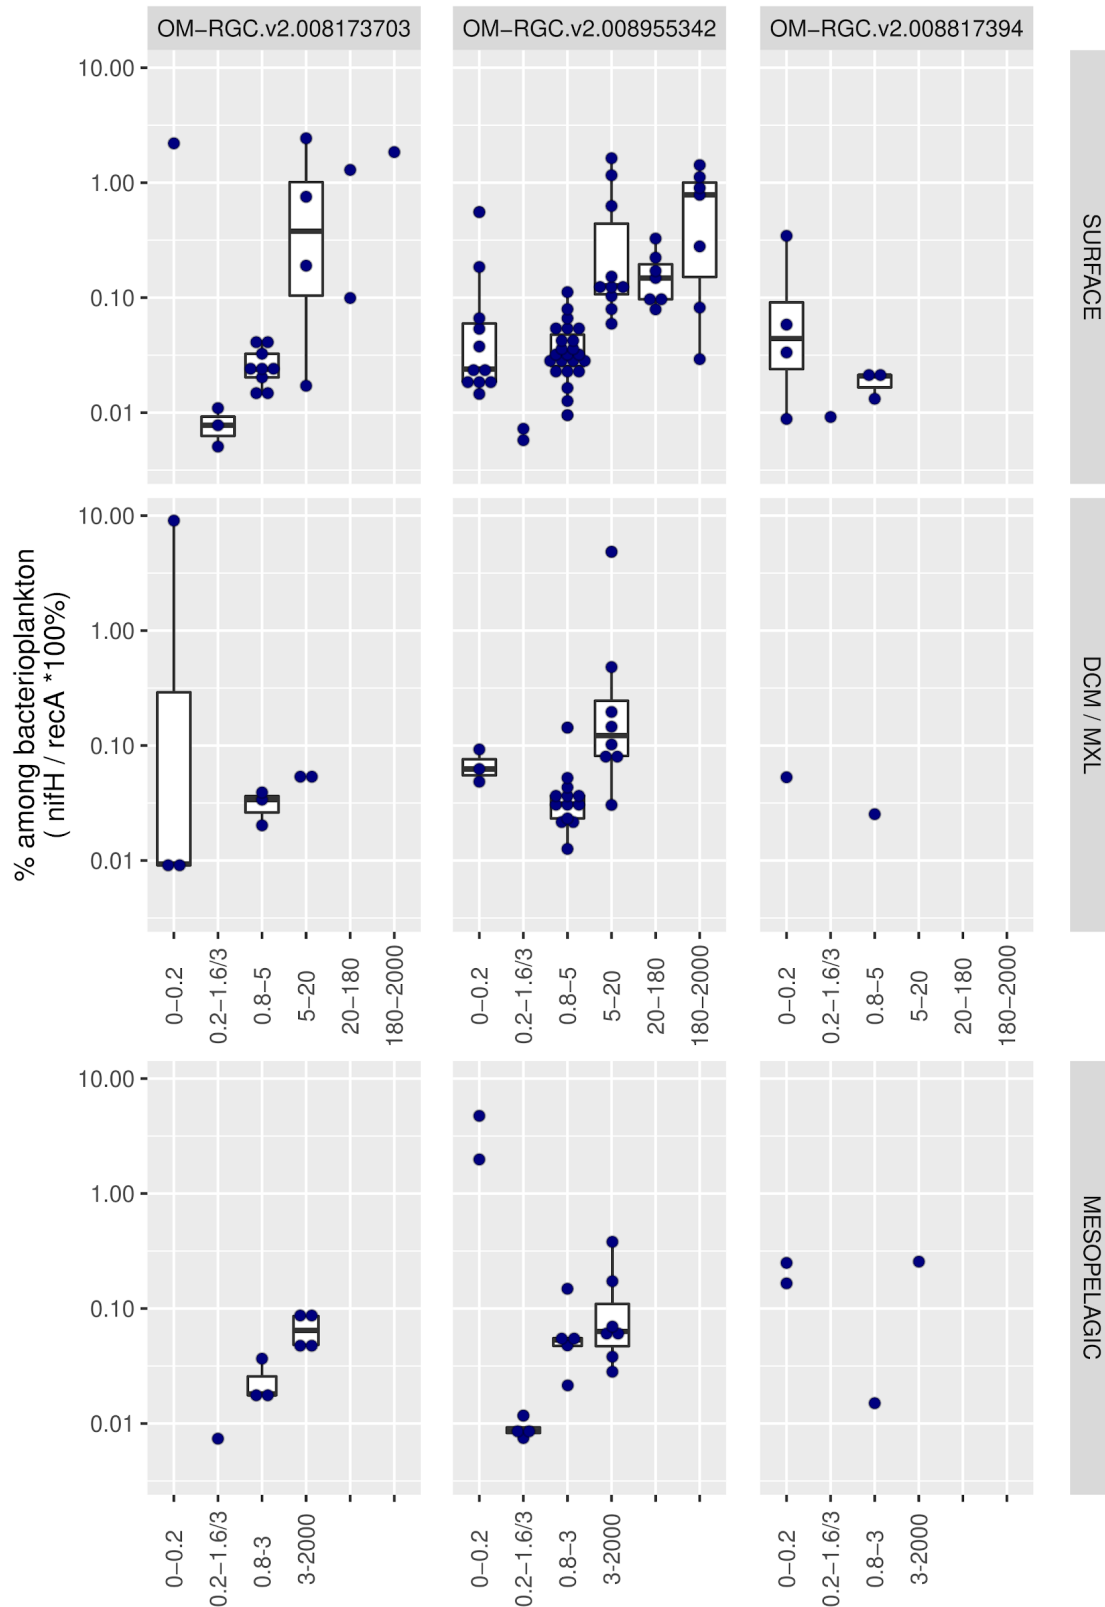

**Supplementary Figure S11:** Distribution of potential ultrasmall diazotrophs across metagenomes obtained in different size-fractionated samples. For each taxon, the percentage in the bacterioplankton community is estimated by the ratio of metagenomic read abundance between the marker genes *nifH* and *recA*. The 'OM-RGC.v2' prefix indicates the *nifH* sequences assembled from the metagenomes of <0.22  $\mu\text{m}$  size fraction (Salazar et al., 2019).
